1 **Species-specific oscillation periods of human and mouse segmentation clocks**  
2 **are due to cell autonomous differences in biochemical reaction parameters**

3  
4 Mitsuhiro Matsuda<sup>1, 2</sup>, Hanako Hayashi<sup>1</sup>, Jordi Garcia-Ojalvo<sup>3</sup>, Kumiko Yoshioka-  
5 Kobayashi<sup>4</sup>, Ryoichiro Kageyama<sup>4</sup>, Yoshihiro Yamanaka<sup>5</sup>, Makoto Ikeya<sup>5</sup>, Junya  
6 Toguchida<sup>4, 5</sup>, Cantas Alev<sup>5</sup>, Miki Ebisuya<sup>1, 2\*</sup>

7  
8 <sup>1</sup>RIKEN Center for Biosystems Dynamics Research (RIKEN BDR)  
9 2-2-3 Minatojima-minamimachi, Chuo-ku, 650-0047 Kobe, Japan

10 <sup>2</sup>European Molecular Biology Laboratory (EMBL) Barcelona  
11 Dr. Aiguader 88, 08003 Barcelona, Spain

12 <sup>3</sup>Department of Experimental and Health Sciences, Universitat Pompeu Fabra  
13 Dr. Aiguader 88, 08003 Barcelona, Spain

14 <sup>4</sup>Institute for Frontier Life and Medical Sciences, Kyoto University  
15 Shogoin-Kawahara-cho, Sakyo-ku, 606-8507 Kyoto, Japan

16 <sup>5</sup>Center for iPS Cell Research and Application (CiRA), Kyoto University  
17 53 Shogoin-Kawahara-cho, Sakyo-ku, 606-8507 Kyoto, Japan

18

19

20 \*Correspondence to M Ebisuya ([miki.ebisuya@embl.es](mailto:miki.ebisuya@embl.es))

21

1 **Abstract**

2 While the mechanisms of embryonic development are similar between mouse and human,  
3 the tempo is in general slower in human. The cause of interspecies differences in  
4 developmental time remains a mystery partly due to lack of an appropriate model system<sup>1</sup>.  
5 Since murine and human embryos differ in their sizes, geometries, and nutrients, we use  
6 *in vitro* differentiation of pluripotent stem cells (PSCs) to compare the same type of cells  
7 between the species in similar culture conditions. As an example of well-defined  
8 developmental time, we focus on the segmentation clock, oscillatory gene expression that  
9 regulates the timing of sequential formation of body segments<sup>2-4</sup>. In this way we  
10 recapitulate the murine and human segmentation clocks *in vitro*, showing that the species-  
11 specific oscillation periods are derived from cell autonomous differences in the speeds of  
12 biochemical reactions. Presomitic mesoderm (PSM)-like cells induced from murine and  
13 human PSCs displayed the oscillatory expression of HES7, the core gene of the  
14 segmentation clock<sup>5,6</sup>, with oscillation periods of 2-3 hours (mouse PSM) and 5-6 hours  
15 (human PSM). Swapping HES7 loci between murine and human genomes did not change  
16 the oscillation periods dramatically, denying the possibility that interspecies differences  
17 in the sequences of HES7 loci might be the cause of the observed period difference.  
18 Instead, we found that the biochemical reactions that determine the oscillation period,  
19 such as the degradation of HES7 and delays in its expression, are slower in human PSM  
20 compared with those in mouse PSM. With the measured biochemical parameters, our  
21 mathematical model successfully accounted for the 2-3-fold period difference between  
22 mouse and human. We further demonstrate that the concept of slower biochemical  
23 reactions in human cells is generalizable to several other genes, as well as to another cell  
24 type. These results collectively indicate that differences in the speeds of biochemical  
25 reactions between murine and human cells give rise to the interspecies period difference  
26 of the segmentation clock and may contribute to other interspecies differences in  
27 developmental time.

28

29 **Main**

30 To compare murine and human segmentation clocks *in vitro*, we induced PSM-like cells  
31 from mouse embryonic stem cells (ESCs) and human induced pluripotent stem cells  
32 (iPSCs) (Fig. 1a), as other groups have recently reported<sup>7-12</sup>. In essence, our PSM  
33 induction protocol is based on activation of WNT and FGF signaling as well as inhibition  
34 of TGF $\beta$  and BMP signaling<sup>9,12</sup>. Prior to the PSM induction, mouse ESCs, which are in  
35 the naïve pluripotent state, were pretreated with ACTIVIN A and bFGF and converted to  
36 mouse epiblast-like cells (EpiLCs) that possess primed pluripotency as human iPSCs do.

1 To visualize the segmentation clock in the induced PSM, we introduced a HES7 promoter-  
2 luciferase reporter<sup>13,14</sup>, detecting clear synchronized oscillations of HES7 expression in  
3 both murine and human PSM (Fig. 1b; Supplementary Video 1). Interestingly, the  
4 oscillation periods, i.e., the durations for one cycle, were different between the species:  
5 mouse PSM oscillated with a period of  $122 \pm 2$  min (mean  $\pm$  sd) whereas human PSM  
6 exhibited a  $322 \pm 6$  min period (Fig. 1c-e). These numbers are consistent with the  
7 literature: The period of the murine segmentation clock *in vivo* is 2-3 hours<sup>13,15,16</sup>. While  
8 visualizing the segmentation clock in a human embryo is ethically difficult, the human  
9 period has been roughly estimated to be 4-6 hours with fixed samples through counting  
10 the number of somites, which are periodically formed according to the segmentation  
11 clock<sup>17,18</sup>. Thus, we concluded that our induced PSM recapitulates the species-specific  
12 periods of the segmentation clock and serves as an ideal *in vitro* platform to investigate  
13 the cause of the 2-3-fold period difference between mouse and human.

14 The gene regulatory network of the segmentation clock consists of two parts: the  
15 intracellular network that gives rise to a cell autonomous oscillation in each cell and the  
16 intercellular network that synchronizes the oscillations among neighboring cells  
17 (Supplementary Fig. 1a)<sup>19-21</sup>. We therefore first attempted to clarify whether the  
18 interspecies period difference stems from the single-cell oscillator or the multicellular  
19 synchronized oscillations. Because cell-cell communication through NOTCH-DELTA  
20 signaling has been reported to synchronize oscillations among cells by regulating HES7  
21 expression<sup>20,22-24</sup>, we treated both murine and human PSM with a NOTCH inhibitor,  
22 DAPT. While the expression level of the HES7 reporter decreased upon administration of  
23 DAPT (Fig. 1f, Original), the oscillation period did not change significantly in either  
24 species (Fig. 1f, g; Supplementary Fig. 1b). Although WNT and FGF signaling pathways  
25 have also been reported to modulate the segmentation clock<sup>25-28</sup>, the existence of high  
26 dosages of a WNT agonist, CHIR, and bFGF in the culture medium suggests that cell-cell  
27 communication through these pathways should not be crucial for the interspecies period  
28 difference. Furthermore, we measured the oscillation period in a sparse cell culture, where  
29 cells do not contact each other (Fig. 1h; Supplementary Fig. 2; Supplementary Video 2).  
30 Those isolated PSM cells still displayed the 2-3-fold period difference between the  
31 species (mouse:  $160 \pm 9$  min; human:  $376 \pm 51$  min) (Fig. 1i), even though the oscillations  
32 at the single-cell level were noisier and slower than the population level oscillations (see  
33 Supplementary Fig. 2b, c). These results indicate that the period difference of HES7  
34 oscillation between mouse and human is cell autonomous, and that the cause of the  
35 interspecies difference should lie in the oscillation mechanism at the single-cell level.

1 HES7 oscillations have been proposed to arise from a delayed autoregulatory  
2 negative feedback loop: HES7, a transcription repressor, directly binds to and inhibits its  
3 own promoter with time delays, resulting in an oscillatory expression of HES7  
4 (Supplementary Fig. 1a)<sup>6,14,29,30</sup>. Knocking out other HES family members, such as HES1  
5 and HES5, does not disrupt segmentation in mouse embryos<sup>31</sup>. Since HES7 itself is  
6 considered the most critical gene for HES7 oscillation, we first hypothesized that  
7 differences in the sequences of HES7 loci between murine and human genomes might  
8 lead to the observed oscillation period difference. To test this hypothesis, we swapped  
9 HES7 loci between mouse and human (Fig. 2a): the human HES7 locus, which was  
10 defined as the sequence including a promoter, exons, introns, and UTRs of HES7, was  
11 knocked into the mouse HES7 locus in mouse ESCs (Fig. 2b; Supplementary Fig. 3), and  
12 the resulting cells were induced to differentiate into the PSM fate. The homozygous  
13 knock-in (i.e., human HES7/human HES7, hereafter referred to as ‘homo swap’) PSM  
14 and the heterozygous knock-in (human HES7/mouse HES7, hereafter referred to as  
15 ‘hetero swap’) PSM showed slightly longer oscillation periods of  $146 \pm 7$  min and  $133 \pm$   
16  $4$  min, respectively, as compared with the  $124 \pm 3$  min period of wild-type (mouse  
17 HES7/mouse HES7) mouse PSM (Fig. 2c, d; Supplementary Fig. 4a). Considering that  
18 the period of wild-type human PSM is 322 min (see Fig. 2d, Wt Human PSM), however,  
19 the period extension in homo swap mouse PSM is minor. To confirm this finding, we  
20 created knock-in mice containing the human HES7 locus. The homo swap mice appeared  
21 largely normal, even though their vertebrae, which are derivatives of somites and  
22 therefore subject to the influence of the segmentation clock, displayed minor defects (Fig.  
23 2e; Supplementary Fig. 5). The *ex vivo* measurements of the segmentation clock in homo  
24 swap embryos showed  $\sim 30$  min longer oscillation period as compared with wild-type  
25 embryos (Fig. 2f-h; Supplementary Fig. 4b), consistent with the  $\sim 20$  min period extension  
26 in the homo swap samples of induced PSM (see Fig. 2d). However, the 20-30 min period  
27 extension in homo swap PSM/embryos is far from the  $\sim 200$  min period difference  
28 between mouse and human, so these results suggest that human HES7 locus in mouse  
29 PSM gives rise to an essentially mouse-like oscillation period.

30 One potential defect in our experimental design of interspecies genome  
31 swapping is, however, that the swapped HES7 region might not be long enough, and that  
32 a crucial sequence for the oscillation period might exist upstream of the HES7 promoter  
33 we defined, for instance. To rule out this possibility, we performed ‘knock-out and rescue’  
34 assays (Fig. 2i): The endogenous mouse HES7 gene was first knocked out in mouse ESCs,  
35 leading to disruption of the HES7 oscillation in the induced PSM (Fig. 2j). Then the  
36 disrupted oscillation was rescued by introducing an exogenous construct containing a

1 promoter, exons, introns, and UTRs of murine or human HES7 locus (Fig. 2k;  
2 Supplementary Fig. 4c). Note that these exogenous constructs were integrated into  
3 random positions of the genome by transposon vectors, implying that the HES7 regions  
4 used for the constructs should be sufficiently long to restore the oscillations. Importantly,  
5 both murine and human HES7 constructs restored mouse-like oscillation periods in the  
6 mouse PSM (Fig. 2l). We further attempted a ‘complementary’ experiment: we knocked  
7 out the endogenous human HES7 gene and rescued the disrupted oscillation with the  
8 murine or human HES7 construct in human PSM (Fig. 2m, n). Again, murine and human  
9 HES7 constructs were indistinguishable in terms of the restored oscillation period (Fig.  
10 2o). These results collectively indicate that the 2-3-fold period difference between murine  
11 and human segmentation clocks is not caused by the sequence differences between  
12 murine and human HES7 loci.

13 We then hypothesized that differences not in the sequences but in the  
14 biochemical reaction speeds of HES7 between murine and human cells might lead to the  
15 observed oscillation period difference. Since the most important biochemical parameters  
16 that affect the oscillation period of HES7 are the degradation rates of HES7 (i.e.,  $\delta_m$  and  
17  $\delta_p$  in Fig. 3a) and the delays in the feedback loop of HES7 ( $\tau_{Tx}$ ,  $\tau_{In}$ ,  $\tau_{TI}$ , and  $\tau_{Rp}$  in Fig.  
18 3a)<sup>14,20,29,30,32</sup>, we measured those parameters in both murine and human PSM, exploring  
19 which parameter(s) are different between the species. To measure the degradation rate of  
20 HES7 protein ( $\delta_p$ ), we overexpressed either the murine or human HES7 sequence and  
21 then halted its expression (Fig. 3b). Interestingly, both murine and human HES7 proteins  
22 were degraded more slowly in human PSM as compared with mouse PSM (Fig. 3b, c;  
23 Supplementary Fig. 6a), meaning that the changes in the degradation rate depend on the  
24 differences not in the HES7 sequences but in the cellular environments (i.e., whether  
25 HES7 is hosted in a murine or human cell). The half-life of HES7 protein in mouse was  
26 previously reported to be 22 min<sup>29</sup>, consistent with our measurements where half-lives in  
27 murine and human PSM were estimated to be  $21 \pm 0.8$  min and  $40 \pm 4$  min, respectively.

28 To measure the delay caused by the transcription and translation of HES7, we  
29 induced the expression of HES7 and estimated the onset time by fitting the results to a  
30 standard gene expression model in which transcription and translation are assumed to  
31 occur in a linear manner with the corresponding delays (Fig. 3d, e; Supplementary Fig.  
32 6b). The transcription and translation delay ( $\tau_{TxTI}$ ) of HES7 was estimated to be longer in  
33 human PSM ( $30 \pm 1$  min) as compared with mouse PSM ( $17 \pm 2$  min) (Fig. 3f, top). The  
34 fitting also allowed us to estimate the degradation rate of HES7 mRNA ( $\delta_m$ ), showing  
35 slower degradation in human PSM (half-life in mouse:  $10 \pm 0.3$  min; in human:  $16 \pm 0.3$   
36 min) (Fig. 3f, bottom). Note that the HES7 gene used in these measurements did not

1 include the introns (see Fig. 3b, d). Since introns affect mRNA splicing and therefore  
2 serve as another source of delays<sup>14,30,32</sup>, we measured the delay caused by HES7 introns  
3 by creating HES7 promoter-luciferase reporters with (w/) and without (w/o) HES7 introns  
4 (Fig. 3g, h) and estimating the phase difference between the oscillations of the two  
5 reporters (Fig. 3g; Supplementary Fig. 7). Again, the HES7 intron delay ( $\tau_m$ ) was longer  
6 in human PSM ( $37 \pm 3$  min) compared with mouse PSM ( $13 \pm 3$  min) (Fig. 3i). Roughly  
7 consistent with our measurements, the intron delay or splicing delay in mouse embryos  
8 was previously reported to be 12-19 min<sup>14,32</sup>. Finally, to measure the delay for HES7 to  
9 start repressing its own promoter, we induced the expression of HES7 and estimated the  
10 onset of decline in the HES7 promoter activity (Fig. 3j; Supplementary Fig. 8). Fitting  
11 the results to an open loop repression model in which the induced HES7 protein represses  
12 the expression of HES7 promoter-luciferase reporter showed that the HES7 repression  
13 delay ( $\tau_{Rp}$ ) is negligible in both murine and human PSM.

14 To confirm that the degradation rates and delays measured in both murine and  
15 human PSM can indeed explain the interspecies period difference in the segmentation  
16 clock, we built a simple mathematical model of HES7 oscillation<sup>20</sup> based directly on the  
17 following parameters:  $\delta_p$ ,  $\delta_m$ ,  $\tau_{TxTl}$ ,  $\tau_{In}$ , and  $\tau_{Rp}$  (Fig. 3k; see Methods). Note that our  
18 mathematical analyses of the model showed that the oscillation period depends on these  
19 measured parameters (i.e., degradation rates and total delays), and that other parameters,  
20 such as the transcription and translation rates and the repression threshold, essentially do  
21 not affect the period (Supplementary Text 1)<sup>20</sup>. Even though one unmeasured parameter,  
22 the repression Hill coefficient, potentially affects the oscillation period (Supplementary  
23 Text 1), varying this parameter within a realistic range did not change the period  
24 dramatically (Fig. 3l). Remarkably, our simulation of oscillations with the murine  
25 parameters showed periods of  $\sim 150$  min whereas that with human parameters showed  
26  $\sim 300$  min periods (Fig. 3l), reproducing the 2-3-fold period difference between actual  
27 murine and human PSM (see Fig. 1e). These results mean that the slower biochemical  
28 reactions of HES7 (i.e., slower degradations and longer delays) in human PSM as  
29 compared with those in mouse PSM are sufficient to quantitatively account for the longer  
30 oscillation period of the human segmentation clock.

31 Next, we explored how universal our finding of slower biochemical reactions in  
32 human cells is. To test whether it is specific to the HES7 gene or generalizable to other  
33 genes, we measured the degradation rates of six other genes, transcription factors  
34 expressed at the PSM stage<sup>7</sup> (Fig. 4a, b; Supplementary Fig. 9). GBX2, MSGN1, and  
35 TBX6 proteins showed slower degradation rates in human PSM than in mouse PSM,  
36 whereas CDX2, EVX1, and Brachyury T did not (Fig. 4c). We also measured the



1 transcription and intron delays ( $\tau_{Tx}$ ,  $\tau_m$ ) (Fig. 4d, e; Supplementary Fig. 10). TBX6, GBX2,  
2 and MSGN1 showed longer delays in human PSM than in mouse PSM whereas EVX1  
3 did not show a significant interspecies difference (Fig. 4f). These results suggest that the  
4 slower biochemical reactions in human PSM with respect to mouse PSM can extend to  
5 several other genes, but not to all genes.

6 Finally, to test whether the slower biochemical reactions in human cells are  
7 specific to PSM or generalizable to other cell types, we induced neural progenitor cells  
8 (NPCs) from mouse ESCs and human iPSCs (Fig. 4g)<sup>33,34</sup>. We measured the degradation  
9 rates of neural marker genes<sup>34</sup> in both murine and human induced NPCs (Fig. 4h;  
10 Supplementary Fig. 11). All the four proteins tested, OTX2, FOXG1, PAX6, and SOX1,  
11 showed slower degradation rates in human NPCs as compared with mouse NPCs (Fig.  
12 4i). We also measured the transcription and intron delays of OTX2, FOXG1, and SOX1  
13 (Fig. 4j; Supplementary Fig. 12), demonstrating slightly longer delays in human NPCs  
14 for all three genes (Fig. 4k). These results suggest that slower biochemical reactions in  
15 human cells can be applicable not only to the PSM fate but also to other cell types, even  
16 though more systematic measurements will be necessary in the future. We propose that  
17 murine and human cells possess species-specific cellular environments that affect speeds  
18 of several biochemical reactions including degradations and delays (Fig. 4l), potentially  
19 causing other interspecies differences in developmental time. The cellular environments  
20 can mean any gene set or any cellular characteristic, such as the metabolic rate and cell  
21 size.

22 In summary, we have shown that the human segmentation clock exhibits 2-3-  
23 times slower oscillations in comparison with mouse, because of slower degradation rates  
24 of HES7 and longer delays in its expression in a human PSM cell. An obvious next  
25 challenge is to reveal the mechanism by which human cells display slower biochemical  
26 reactions. Since our results have revealed the existence of several other genes that show  
27 different reaction speeds between murine and human cells, it may be interesting to  
28 classify the genes that show such an interspecies difference and to find commonalities  
29 among them. Another future challenge is to investigate developmental time of other  
30 species than mouse and human. Interestingly, delays due to splicing and export of mRNAs  
31 of HES-related genes have previously been reported to be different among mouse, chick,  
32 and zebrafish<sup>32</sup>. Because ESCs and iPSCs of diverse mammals are now available<sup>35,36</sup>,  
33 their *in vitro* differentiation will enable to compare the same cell types among different  
34 mammalian species and to study their different tempos of development.

35  
36

## 1 **Methods**

2

### 3 **Pluripotent stem cell cultures**

4 Mouse ESCs (EB5, a gift from H. Niwa) were maintained on gelatin coated dish with  
5 GMEM containing 10% KSR, 1% FBS, nonessential amino acids (1 mM),  $\beta$ -  
6 mercaptoethanol (0.1 mM), sodium pyruvate (1 mM), LIF (2000 U/ml), CHIR99021 (3  
7  $\mu$ M), and PD0325901 (1  $\mu$ M). Human iPSCs (201B7, feederless) were maintained on  
8 iMatrix-511 silk (Nippi) coated dishes or plates with StemFit AK02N medium  
9 (Ajinomoto).

10

### 11 **DNA constructs**

12 The genetic constructs are listed in Supplementary Table 2. The promoters or genes were  
13 subcloned into pDONR vector to create entry clones. These entry clones were recombined  
14 with *piggyBac* vector (a gift from K. Woltjen)<sup>37</sup> by using the Multisite Gateway  
15 technology (Invitrogen). The DNA constructs were introduced into the cells with Amaxa  
16 Nucleofector (Lonza).

17

### 18 **Induction of murine and human PSM**

19 Mouse ESCs were first cultured in N2B27 medium containing 1% KSR, ACTIVIN A (20  
20 ng/ml), and bFGF (10 ng/ml) for 4 days and converted to mouse EpiLCs<sup>38,39</sup>. The induced  
21 mouse EpiLCs were further cultured in CDMi<sup>40</sup> containing SB431542 (10  $\mu$ M), DMH1  
22 (2  $\mu$ M), CHIR99021 (10  $\mu$ M), and bFGF (20 ng/ml) for 2 days to induce mouse PSM  
23 cells. To induce human PSM cells, our 1 step induction protocol<sup>9</sup> was mainly used.  
24 Human iPSCs were seeded on a 35 mm dishes coated with iMatrix-511 silk or matrigel  
25 and cultured for 4 days. Then the cells were cultured in CDMi containing SB431542 (10  
26  $\mu$ M), DMH1 (2  $\mu$ M), CHIR99021 (10  $\mu$ M), and bFGF (20 ng/ml) for another 3.5 days to  
27 induce human PSM cells. For the degradation assay, our 2 step induction protocol<sup>12</sup> was  
28 used. Human iPSCs were seeded on a 35 mm dish coated with iMatrix-511 silk and  
29 cultured for 5 days. Then the medium was changed into CDMi containing bFGF (20  
30 ng/ml), CHIR99021 (10  $\mu$ M), and ACTIVIN A (50 ng/ml) for 24 hours to induce  
31 primitive streak (PS) cells. The induced PS cells were further cultured in CDMi  
32 containing SB431542 (10  $\mu$ M), CHIR99021 (3  $\mu$ M), LDN-193189 (250 nM), and bFGF  
33 (20 ng/ml) for 24 hours to induce human PSM cells.

34

### 35 **Induction of murine and human NPCs**



1 To induce mouse NPCs, mouse ESCs were seeded on a gelatin coated dish and cultured  
2 in the NDiff 227 medium (TAKARA) for 5 days<sup>33</sup>. To induce human NPCs, human iPSCs  
3 were seeded on a matrigel coated dish and cultured in the STEMdiff SMADi Neural  
4 Induction medium (STEMCELL Technologies) for 7 days<sup>34</sup>. NPC differentiation was  
5 checked by immunostaining with an anti-PAX6 antibody (BioLegend).

## 6 7 **Oscillation analyses**

8 After the induction of murine or human PSM cells, the medium was changed into CDMi  
9 containing SB431542 (10  $\mu$ M), DMH1 (2  $\mu$ M), CHIR99021 (1  $\mu$ M), bFGF (20 ng/ml),  
10 and D-luciferin (200  $\mu$ M or 1mM) to monitor oscillations of the HES7 reporter signal.  
11 For the single cell imaging, the induced PSM cells were re-seeded on iMatrix-511 silk  
12 coated dish. After 6 hours, the medium was changed into CDMi containing SB431542  
13 (10  $\mu$ M), DMH1 (2  $\mu$ M), CHIR99021 (1  $\mu$ M), bFGF (20 ng/ml), Latrunculin A (0.5  
14  $\mu$ M)<sup>41</sup>, and D-luciferin (1 mM). Bioluminescence was measured with Kronos Dio  
15 Luminometer (Atto) or LCV110 microscope (Olympus). The obtained signal was  
16 detrended by using a 60 min (mouse), 90 min (human), or 100 min (human single cell)  
17 moving average-subtraction method. The data displayed were normalized to the 1st peak  
18 of oscillations. The oscillation period was defined as the time interval between the 1st and  
19 4th peaks divided by 3 cycles. For *ex vivo* measurements, the period was defined with the  
20 1st and 3rd peaks.

## 21 22 **HES7 loci swapping**

23 The CRISPR guide sequences for HES7 swapping were cloned into pSpCas9(BB)-2A-  
24 GFP vector (addgene #48138)<sup>42</sup> (see Supplementary Table 2). As the template for  
25 homologous recombination, a bacterial artificial chromosome (BAC) containing human  
26 HES7 locus (RP11-769H22)<sup>43</sup> was obtained from BACPAC resources center (Children's  
27 Hospital & Research Center at Oakland). After homology arms were inserted (see  
28 Supplementary Table 2), the purified BAC was introduced into mouse ESCs with  
29 CIRSPr/Cas9 guides to swap the HES7 loci between mouse and human.

## 30 31 **Southern blotting**

32 Southern blotting was performed according to the DIG Application Manual for Filter  
33 Hybridization (Roche) using the PCR DIG Probe Synthesis kit (Roche). The probe  
34 sequences are available in Supplementary Table 2.

## 35 36 **HES7 knockout**

1 The CRISPR guide sequences for HES7 knockout were cloned into pSpCas9(BB)-2A-  
2 GFP (see Supplementary Table 2). HES7 knockout was performed using transient  
3 transfection of multiple CRISPR guide constructs. The deletion of HES7 was confirmed  
4 by PCR.

## 5 6 **Transgenic mice and *ex vivo* tissue culture**

7 HES7 swapping was performed in mouse ESCs (TT2)<sup>44</sup>. Two hetero swap ESC clones  
8 were isolated, and chimeric mice were generated according to standard procedures. The  
9 body segments of transgenic mice were imaged at 4 weeks with *in vivo* micro X-ray CT  
10 System R\_mCT (RIGAKU). Mice carrying the HES7 reporter pH7-UbLuc-In (-) were  
11 previously described<sup>14</sup>. Time-lapse imaging of *ex vivo* culture was performed as described  
12 previously<sup>13</sup> with several modifications. Mouse embryos were collected at 10.5 dpc and  
13 dissected in PBS containing 0.2% BSA. Tail portions from Wt and Homo swap embryos  
14 were embedded in 0.2% low-melting point agarose in a silicon ring set onto a 35 mm  
15 glass-bottom dish, and then cultured in DMEM/F12 containing 1% BSA, L-Glutamine (2  
16 mM), D-Glucose (1 g/L), HEPES (15 mM), and D-luciferin (1 mM) with 5% CO<sub>2</sub> and  
17 80% O<sub>2</sub>. Imaging was performed on IX81 microscope (Olympus) equipped with  
18 VersArray CCD camera (Princeton Instruments). All animal experiments were approved  
19 by the Institutional Animal Care and Use Committee of RIKEN Kobe Branch or Kyoto  
20 University, and performed according to animal experimentation guidelines of RIKEN and  
21 Kyoto University.

## 22 23 **Models and parameter measurements**

### 24 1. HES7 oscillation model

25 To simulate the oscillation of HES7, previously proposed delay differential equations of  
26 HES feedback loop were used<sup>20</sup>.

$$27 \quad \frac{dm}{dt} = \frac{\beta}{1 + \left(\frac{p(t - \tau_m)}{K}\right)^n} - \delta_m m \quad (1)$$

$$28 \quad \frac{dp}{dt} = \alpha m(t - \tau_p) - \delta_p p \quad (2)$$

29 where  $m$  and  $p$  are the concentrations of mRNA and protein, respectively.  $\delta_m$  and  $\delta_p$  are  
30 the degradation rates of mRNA and protein,  $\alpha$  and  $\beta$  are the translation and transcription  
31 rates,  $K$  is the repression threshold, and  $n$  is the repression Hill coefficient.  $\tau_m$  and  $\tau_p$  are  
32 the mRNA and protein delays, and they have the following relationships with the  
33 experimentally measured delays:

$$34 \quad \tau_m = \tau_{Rp} + \tau_{Tx} + \tau_{In}, \quad \tau_p = \tau_{Tl}$$

1 where  $\tau_{Rp}$ ,  $\tau_{Tx}$ ,  $\tau_{In}$ , and  $\tau_{TI}$  are the repression, transcription, intron, and translation delays,  
2 respectively. The parameter values are summarized in Supplementary Table 1. The  
3 numerical calculation was performed with dde23 of MATLAB (Mathworks), and the  
4 oscillation periods were estimated by computing the power spectra of the time series.

## 5 6 2. Degradation assay of HES7

7 The overexpression of a fusion construct of HES7 and NLuc was regulated by the rTetOne  
8 system (reverse TetOne system; see Supplementary Table 2). The construct was  
9 introduced into mouse ESCs or human iPSCs where the endogenous HES7 was knocked  
10 out. After PSM cells were induced in the presence of Doxycycline (Dox; 100 ng/ml), the  
11 expression of the fusion protein was initiated by washing out Dox and changing the  
12 medium into CDMi containing protected furimazine (Promega; 1  $\mu$ M). After the NLuc  
13 signal was confirmed 5-8 hours later, the expression of the fusion protein was halted by  
14 Dox (300 ng/ml) addition, and the decay of NLuc signal was monitored with Kronos Dio  
15 luminometer. To exclude the influence of residual mRNAs, only the later time points  
16 where the NLuc signal displayed a single exponential decay curve were used. To estimate  
17 the protein degradation rate ( $\delta_p$ ) of HES7, the slope of log-transformed data was  
18 calculated with the least square method of R.

## 19 20 3. Expression delay assay of HES7

21 The overexpression of a fusion construct of HES7 (w/o intron) and NLuc was regulated  
22 by the TetOne system. The construct was introduced into mouse ESCs or human iPSCs  
23 where the endogenous HES7 was knocked out. After PSM cells were induced in the  
24 absence of Dox, the medium was changed into CDMi containing protected furimazine (1  
25  $\mu$ M). Six hours after the medium change, the expression of the fusion protein was initiated  
26 by Dox (300 ng/ml), and the onset of NLuc signal was monitored with Kronos Dio  
27 luminometer. To estimate the sum of the transcription delay and translation delay ( $\tau_{TxTI}$ )  
28 of HES7 as well as the mRNA degradation rate ( $\delta_m$ ) of HES7, models for the expression  
29 delay assay and degradation assay were constructed.

30 Expression delay model:

31 
$$\frac{dm}{dt} = -\delta_m m \quad (t < \tau_{Tx})$$

32 
$$\frac{dm}{dt} = \beta_T - \delta_m m \quad (t \geq \tau_{Tx}) \quad (3)$$

33 
$$\frac{dp}{dt} = \alpha m(t - \tau_{TI}) - \delta_p p \quad (4)$$

1 where  $\beta_T$  is the transcription rate of the TetOne promoter.

2 The solution of this is

3  $p(t) = 0 \quad (t < \tau_{TxTI})$

4 
$$p(t) = \frac{a}{\delta_m - \delta_p} \left( e^{-\delta_m(t - \tau_{TxTI})} - \frac{\delta_m}{\delta_p} e^{-\delta_p(t - \tau_{TxTI})} \right) + \frac{a}{\delta_p} \quad (t \geq \tau_{TxTI}) \quad (5)$$

5 where  $\tau_{TxTI} = \tau_{Tx} + \tau_{TI}$ , and  $a = \alpha\beta_T/\delta_m$ .

6 Degradation model:

7 
$$\frac{dm}{dt} = \beta_{rT} - \delta_m m \quad (t < \tau_{Tx})$$

8 
$$\frac{dm}{dt} = -\delta_m m \quad (t \geq \tau_{Tx}) \quad (6)$$

9 
$$\frac{dp}{dt} = \alpha m(t - \tau_{TI}) - \delta_p p \quad (7)$$

10 where  $\beta_{rT}$  is the transcription rate of the rTetOne promoter.

11 The solution of this is

12 
$$p(t) = \frac{b}{\delta_p} \quad (t < \tau_{TxTI})$$

13 
$$p(t) = \frac{b}{\delta_m - \delta_p} \left( \frac{\delta_m}{\delta_p} e^{-\delta_p(t - \tau_{TxTI})} - e^{-\delta_m(t - \tau_{TxTI})} \right) \quad (t \geq \tau_{TxTI}) \quad (8)$$

14 where  $b = \alpha\beta_{rT}/\delta_m$ .

15 As for  $\delta_p$ , the value estimated in the degradation assay was used.  $\tau_{TxTI}$  and  $\delta_m$ , together  
16 with  $a$  and  $b$ , were estimated in Python by simultaneously fitting the data of expression  
17 delay assay and degradation assay to the equations (5) and (8), respectively, with SciPy's  
18 basin-hopping algorithm.

19

#### 20 4. Degradation and expression delay assays of other genes

21 For the degradation assay, the overexpression of a fusion construct of a target gene and  
22 NLuc was regulated by the rTetOne system. The construct was introduced into mouse  
23 ESCs or human iPSCs. After PSM cells or NPCs were induced in the presence of Dox  
24 (100 ng/ml), the expression of the fusion protein was initiated by washing out Dox and  
25 changing the medium into CDMi containing protected furimazine (5  $\mu$ M in human NPCs,  
26 1  $\mu$ M in the other cell types). After the NLuc signal was confirmed 5-8 hours later, the  
27 expression of the fusion protein was halted by Dox (300 ng/ml), and the decay of NLuc  
28 signal was monitored with Kronos Dio luminometer. To estimate the degradation rate ( $\delta_p$ )  
29 of the fusion protein, the slope of log-transformed data was calculated with the least  
30 square method of R.

1 For the expression delay assay, the overexpression of a fusion construct of FLuc (w/ stop  
2 codon) and a target gene (w/ intron) was regulated by the TetOne system. The construct  
3 was introduced into mouse ESCs or human iPSCs. After PSM cells or NPCs were induced  
4 in the absence of Dox, the medium was changed into CDMi containing D-luciferin (200  
5  $\mu\text{M}$ ). Six hours after the medium change, the expression of the fusion construct was  
6 initiated by Dox (300 ng/ml), and the onset of FLuc signal was monitored with Kronos  
7 Dio luminometer. To estimate the sum of the transcription delay, intron delay, and  
8 translation delay ( $\tau_{TxInTl}$ ) of the fusion construct, a model for expression delay assay was  
9 constructed.

10 Expression delay model:

$$11 \quad \frac{dm}{dt} = -\delta_m m \quad (t < \tau_{Tx} + \tau_{In})$$

$$12 \quad \frac{dm}{dt} = \beta_T - \delta_m m \quad (t \geq \tau_{Tx} + \tau_{In}) \quad (9)$$

$$13 \quad \frac{dp}{dt} = \alpha m(t - \tau_{Tl}) - \delta_p p \quad (10)$$

14 The solution of this is

$$15 \quad p(t) = 0 \quad (t < \tau_{TxInTl})$$

$$16 \quad p(t) = \frac{a}{\delta_m - \delta_p} \left( e^{-\delta_m(t - \tau_{TxInTl})} - \frac{\delta_m}{\delta_p} e^{-\delta_p(t - \tau_{TxInTl})} \right) + \frac{a}{\delta_p} \quad (t \geq \tau_{TxInTl}) \quad (11)$$

17 where  $\tau_{TxInTl} = \tau_{Tx} + \tau_{In} + \tau_{Tl}$ .

18  $\tau_{TxInTl}$  for each target gene, together with  $\delta_m$ ,  $\delta_p$ , and  $a$ , were estimated in Python by fitting  
19 the data of expression delay assay to the equation (11) with SciPy's basin-hopping  
20 algorithm.

21

## 22 5. Intron delay assay

23 The HES7 promoter-NLuc-stop-HES7 (w/o intron) and HES7 promoter-FLuc-stop-HES7  
24 (w/ intron) reporter constructs were introduced into mouse ESCs or human iPSCs. After  
25 PSM cells were induced, the medium was changed into CDMi containing protected  
26 furimazine (1  $\mu\text{M}$ ) and D-luciferin (1 mM), and the oscillations of the NLuc and FLuc  
27 signals were simultaneously monitored with Kronos Dio luminometer. To estimate the  
28 intron delay ( $\tau_{In}$ ) of HES7, the oscillation phase difference between the 'w/o intron' and  
29 'w/ intron' reporters was estimated by calculating their cross correlation with R. To  
30 normalize the difference in the maturation/degradation time between NLuc and FLuc,  
31 cells containing the HES7 promoter-NLuc-stop-HES7 (w/o intron) and HES7 promoter-  
32 FLuc-stop-HES7 (w/o intron) constructs were also created, and the phase difference

1 between the NLuc and FLuc reporters was subtracted from that between the w/o intron  
2 and w/ intron reporters.

### 3 4 6. Repression delay assay

5 First, the expression delay assay of FLuc reporter was performed to estimate the  
6 degradation rates of the mRNA ( $\delta_f$ ) and protein ( $\delta_F$ ) of FLuc as well as the  
7 transcription/translation delay ( $\tau_{TxTIF}$ ) of FLuc as described in the section of Expression  
8 delay assay of other genes. Next, the overexpression of a fusion construct of HES7 (w/o  
9 intron) and NLuc was regulated by the TetOne system. The expression of HES7 promoter-  
10 FLuc reporter was repressed by the HES7-NLuc protein. The constructs were introduced  
11 into mouse ESCs or human iPSCs where the endogenous HES7 was knocked out. After  
12 PSM cells were induced in the absence of Dox, the medium was changed into CDMi  
13 containing D-luciferin (200  $\mu$ M). Six hours after the medium change, the expression of  
14 HES7-NLuc protein was initiated by Dox (300 ng/ml), and the onset of decline in the  
15 FLuc reporter signal was monitored with Kronos Dio luminometer. To estimate the  
16 repression delay ( $\tau_{Rp}$ ) of HES7, a model for the repression delay assay was constructed.

17 Repression delay model:

$$18 \quad p(t) = 0 \quad (t < \tau_{TxPI})$$

$$19 \quad p(t) = \frac{a}{\delta_m - \delta_p} \left( e^{-\delta_m(t - \tau_{TxPI})} - \frac{\delta_m}{\delta_p} e^{-\delta_p(t - \tau_{TxPI})} \right) + \frac{a}{\delta_p} \quad (t \geq \tau_{TxPI}) \quad (5)$$

$$20 \quad \frac{df}{dt} = \frac{\beta}{1 + \left( \frac{p(t - \tau_{Rp} - \tau_{Txf})}{K} \right)^n} - \delta_f f \quad (12)$$

$$21 \quad \frac{dF}{dt} = \alpha_F f(t - \tau_{TIF}) - \delta_F F \quad (13)$$

22 where  $f$  and  $F$  are the mRNA and protein concentrations of FLuc, respectively.  $\tau_{Txf}$  and  
23  $\tau_{TIF}$  are the transcription and translation delays of FLuc ( $\tau_{TxTIF} = \tau_{Txf} + \tau_{TIF}$ ), and  $\alpha_F$  is the  
24 translation rate of FLuc. The numerical calculation was performed with Python, and the  
25 resulting  $F(t)$  was multiplied by  $C(t)$  to incorporate the effect of cell population growth.

$$26 \quad C(t) = \frac{f_{norm}}{1 + \left( \frac{1}{C_0} - 1 \right) e^{-\gamma t}} \quad (14)$$

27 where  $C_0$  is the initial cell density,  $\gamma$  is the growth rate, and  $f_{norm}$  is the scaling factor for  
28 luminescence. As for  $\delta_p$ ,  $\delta_m$ ,  $\delta_F$ ,  $\delta_f$ ,  $\tau_{TxPI}$ , and  $\tau_{TxTIF}$ , measured values were used. The data of  
29 repression delay assay were fitted to  $F(t) \times C(t)$  manually. The fitting was good when  $\tau_{Rp}$   
30 = 0 with both murine and human parameters.

### 31 32 Acknowledgments



1 We thank to J. Sharpe, V. Trivedi, X. Diego, and C. Villava for their comments. We also  
2 thank to M. Ogawa and T. Tsuji for helping  $\mu$ CT scan of knock-in mice, to the Laboratory  
3 for Animal Resources and Genetic Engineering (LARGE), RIKEN BDR, for generating  
4 transgenic mice and animal housing, and to M. Matsumiya for helping oscillation  
5 analyses. This work was supported by internal grants from RIKEN and EMBL, Takeda  
6 Science Foundation (to M.E.), Grant-in-Aid for Scientific research (KAKENHI)  
7 programs from Ministry of Education Culture, Sports, Science, and Technology (MEXT)  
8 (16KT0178, 17H05777 to M.M.), and RIKEN Special Postdoctoral Researchers (SPDR)  
9 fellowship (to M.M.).

### 11 **Author contributions**

12 M.M., M.E., and C.A. conceived the usage of murine and human PSM. M.M. and M.E.  
13 conceived the swapping of HES7 loci as well as comparison of biochemical parameters  
14 between mouse and human. M.M. and M.E. designed the work and wrote the manuscript.  
15 M.M. performed most of the experiments and analyzed the data. H.H. and C.A. developed  
16 the induction protocol of mouse PSM. Y.Y., M.I., J.T., and C.A. developed the induction  
17 protocol of human PSM. J.G.-O. constructed mathematical models and fitted them to the  
18 experimental data. K.Y. and R.K. measured the oscillation period in mouse embryos.

### 20 **Competing interests**

21 The authors declare no competing interests.

## 1   **References**

- 2
- 3   1     Ebisuya, M. & Briscoe, J. What does time mean in development? *Development* **145**,  
4     doi:10.1242/dev.164368 (2018).
- 5   2     Dequéant, M. L. & Pourquié, O. Segmental patterning of the vertebrate embryonic  
6     axis. *Nat Rev Genet* **9**, 370-382, doi:10.1038/nrg2320 (2008).
- 7   3     Oates, A. C., Morelli, L. G. & Ares, S. Patterning embryos with oscillations: structure,  
8     function and dynamics of the vertebrate segmentation clock. *Development* **139**, 625-  
9     639, doi:10.1242/dev.063735 (2012).
- 10  4     Hubaud, A. & Pourquié, O. Signalling dynamics in vertebrate segmentation. *Nat Rev*  
11    *Mol Cell Biol* **15**, 709-721, doi:10.1038/nrm3891 (2014).
- 12  5     Bessho, Y., Miyoshi, G., Sakata, R. & Kageyama, R. Hes7: a bHLH-type repressor  
13    gene regulated by Notch and expressed in the presomitic mesoderm. *Genes Cells* **6**,  
14    175-185 (2001).
- 15  6     Bessho, Y., Hirata, H., Masamizu, Y. & Kageyama, R. Periodic repression by the  
16    bHLH factor Hes7 is an essential mechanism for the somite segmentation clock.  
17    *Genes Dev* **17**, 1451-1456, doi:10.1101/gad.1092303 (2003).
- 18  7     Chal, J. *et al.* Differentiation of pluripotent stem cells to muscle fiber to model  
19    Duchenne muscular dystrophy. *Nat Biotechnol* **33**, 962-969, doi:10.1038/nbt.3297  
20    (2015).
- 21  8     Loh, K. M. *et al.* Mapping the Pairwise Choices Leading from Pluripotency to Human  
22    Bone, Heart, and Other Mesoderm Cell Types. *Cell* **166**, 451-467,  
23    doi:10.1016/j.cell.2016.06.011 (2016).
- 24  9     Nakajima, T. *et al.* Modeling human somite development and fibrodysplasia  
25    ossificans progressiva with induced pluripotent stem cells. *Development* **145**,  
26    doi:10.1242/dev.165431 (2018).
- 27  10    Matsumiya, M., Tomita, T., Yoshioka-Kobayashi, K., Isomura, A. & Kageyama, R. ES  
28    cell-derived presomitic mesoderm-like tissues for analysis of synchronized  
29    oscillations in the segmentation clock. *Development* **145**, doi:10.1242/dev.156836  
30    (2018).
- 31  11    Diaz-Cuadros, M. *et al.* In vitro characterization of the human segmentation clock.  
32    *bioRxiv*, 461822 (2018).
- 33  12    Matsuda, M. *et al.* Modeling the Human Segmentation Clock with Pluripotent Stem  
34    Cells. *bioRxiv*, 562447 (2019).

- 1 13 Masamizu, Y. *et al.* Real-time imaging of the somite segmentation clock: revelation  
2 of unstable oscillators in the individual presomitic mesoderm cells. *Proc Natl Acad*  
3 *Sci USA* **103**, 1313-1318, doi:10.1073/pnas.0508658103 (2006).
- 4 14 Takashima, Y., Ohtsuka, T., González, A., Miyachi, H. & Kageyama, R. Intronic delay  
5 is essential for oscillatory expression in the segmentation clock. *Proc Natl Acad Sci*  
6 *USA* **108**, 3300-3305, doi:10.1073/pnas.1014418108 (2011).
- 7 15 Tam, P. P. The control of somitogenesis in mouse embryos. *J Embryol Exp Morphol*  
8 **65 Suppl**, 103-128 (1981).
- 9 16 Tsiairis, C. D. & Aulehla, A. Self-Organization of Embryonic Genetic Oscillators into  
10 Spatiotemporal Wave Patterns. *Cell* **164**, 656-667, doi:10.1016/j.cell.2016.01.028  
11 (2016).
- 12 17 Müller, F. & O'Rahilly, R. Somitic-vertebral correlation and vertebral levels in the  
13 human embryo. *Am J Anat* **177**, 3-19, doi:10.1002/aja.1001770103 (1986).
- 14 18 Turnpenny, P. D. *et al.* Abnormal vertebral segmentation and the notch signaling  
15 pathway in man. *Dev Dyn* **236**, 1456-1474, doi:10.1002/dvdy.21182 (2007).
- 16 19 Jiang, Y. J. *et al.* Notch signalling and the synchronization of the somite segmentation  
17 clock. *Nature* **408**, 475-479, doi:10.1038/35044091 (2000).
- 18 20 Lewis, J. Autoinhibition with transcriptional delay: a simple mechanism for the  
19 zebrafish somitogenesis oscillator. *Curr Biol* **13**, 1398-1408 (2003).
- 20 21 Goldbeter, A. & Pourquié, O. Modeling the segmentation clock as a network of coupled  
21 oscillations in the Notch, Wnt and FGF signaling pathways. *J Theor Biol* **252**, 574-  
22 585, doi:10.1016/j.jtbi.2008.01.006 (2008).
- 23 22 Riedel-Kruse, I. H., Müller, C. & Oates, A. C. Synchrony dynamics during initiation,  
24 failure, and rescue of the segmentation clock. *Science* **317**, 1911-1915,  
25 doi:10.1126/science.1142538 (2007).
- 26 23 Ferjentsik, Z. *et al.* Notch is a critical component of the mouse somitogenesis  
27 oscillator and is essential for the formation of the somites. *PLoS Genet* **5**, e1000662,  
28 doi:10.1371/journal.pgen.1000662 (2009).
- 29 24 Okubo, Y. *et al.* *Lfng* regulates the synchronized oscillation of the mouse  
30 segmentation clock via trans-repression of Notch signalling. *Nat Commun* **3**, 1141,  
31 doi:10.1038/ncomms2133 (2012).
- 32 25 Aulehla, A. *et al.* *Wnt3a* plays a major role in the segmentation clock controlling  
33 somitogenesis. *Dev Cell* **4**, 395-406 (2003).
- 34 26 Dequéant, M. L. *et al.* A complex oscillating network of signaling genes underlies the  
35 mouse segmentation clock. *Science* **314**, 1595-1598, doi:10.1126/science.1133141  
36 (2006).

- 1 27 Niwa, Y. *et al.* The initiation and propagation of Hes7 oscillation are cooperatively  
2 regulated by Fgf and notch signaling in the somite segmentation clock. *Dev Cell* **13**,  
3 298-304, doi:10.1016/j.devcel.2007.07.013 (2007).
- 4 28 Sonnen, K. F. *et al.* Modulation of Phase Shift between Wnt and Notch Signaling  
5 Oscillations Controls Mesoderm Segmentation. *Cell* **172**, 1079-1090.e1012,  
6 doi:10.1016/j.cell.2018.01.026 (2018).
- 7 29 Hirata, H. *et al.* Instability of Hes7 protein is crucial for the somite segmentation  
8 clock. *Nat Genet* **36**, 750-754, doi:10.1038/ng1372 (2004).
- 9 30 Harima, Y., Takashima, Y., Ueda, Y., Ohtsuka, T. & Kageyama, R. Accelerating the  
10 tempo of the segmentation clock by reducing the number of introns in the Hes7 gene.  
11 *Cell Rep* **3**, 1-7, doi:10.1016/j.celrep.2012.11.012 (2013).
- 12 31 Ohtsuka, T. *et al.* Hes1 and Hes5 as notch effectors in mammalian neuronal  
13 differentiation. *EMBO J* **18**, 2196-2207, doi:10.1093/emboj/18.8.2196 (1999).
- 14 32 Hoyle, N. P. & Ish-Horowicz, D. Transcript processing and export kinetics are rate-  
15 limiting steps in expressing vertebrate segmentation clock genes. *Proc Natl Acad Sci*  
16 *USA* **110**, E4316-4324, doi:10.1073/pnas.1308811110 (2013).
- 17 33 Ying, Q. L., Stavridis, M., Griffiths, D., Li, M. & Smith, A. Conversion of embryonic  
18 stem cells into neuroectodermal precursors in adherent monoculture. *Nat Biotechnol*  
19 **21**, 183-186, doi:10.1038/nbt780 (2003).
- 20 34 Chambers, S. M. *et al.* Highly efficient neural conversion of human ES and iPS cells  
21 by dual inhibition of SMAD signaling. *Nat Biotechnol* **27**, 275-280,  
22 doi:10.1038/nbt.1529 (2009).
- 23 35 Ben-Nun, I. F. *et al.* Induced pluripotent stem cells from highly endangered species.  
24 *Nat Methods* **8**, 829-831, doi:10.1038/nmeth.1706 (2011).
- 25 36 Ogorevc, J., Orehek, S. & Dovč, P. Cellular reprogramming in farm animals: an  
26 overview of iPSC generation in the mammalian farm animal species. *J Anim Sci*  
27 *Biotechnol* **7**, 10, doi:10.1186/s40104-016-0070-3 (2016).
- 28 37 Woltjen, K. *et al.* piggyBac transposition reprograms fibroblasts to induced  
29 pluripotent stem cells. *Nature* **458**, 766-770, doi:10.1038/nature07863 (2009).
- 30 38 Guo, G. *et al.* Klf4 reverts developmentally programmed restriction of ground state  
31 pluripotency. *Development* **136**, 1063-1069, doi:10.1242/dev.030957 (2009).
- 32 39 Hayashi, K. & Saitou, M. Generation of eggs from mouse embryonic stem cells and  
33 induced pluripotent stem cells. *Nat Protoc* **8**, 1513-1524, doi:10.1038/nprot.2013.090  
34 (2013).

1 40 Wataya, T. *et al.* Minimization of exogenous signals in ES cell culture induces rostral  
2 hypothalamic differentiation. *Proc Natl Acad Sci U S A* **105**, 11796-11801,  
3 doi:10.1073/pnas.0803078105 (2008).

4 41 Hubaud, A., Regev, I., Mahadevan, L. & Pourquié, O. Excitable Dynamics and Yap-  
5 Dependent Mechanical Cues Drive the Segmentation Clock. *Cell* **171**, 668-682.e611,  
6 doi:10.1016/j.cell.2017.08.043 (2017).

7 42 Ran, F. A. *et al.* Genome engineering using the CRISPR-Cas9 system. *Nat Protoc* **8**,  
8 2281-2308, doi:10.1038/nprot.2013.143 (2013).

9 43 Osoegawa, K. *et al.* A bacterial artificial chromosome library for sequencing the  
10 complete human genome. *Genome Res* **11**, 483-496, doi:10.1101/gr.169601 (2001).

11 44 Yagi, T. *et al.* A novel ES cell line, TT2, with high germline-differentiating potency.  
12 *Anal Biochem* **214**, 70-76, doi:10.1006/abio.1993.1458 (1993).

13  
14

1 **Figure legends**

2

3 **Figure 1 Cell autonomous period difference between murine and human**  
4 **segmentation clocks**

5 **a**, Induction of PSM-like cells. Mouse ESCs were pretreated with ACTIVIN A and bFGF  
6 to induce mouse EpiLCs. Mouse EpiLCs and human iPSCs were treated with WNT  
7 agonist, bFGF, TGF $\beta$  inhibitor, and BMP inhibitor to induce the PSM fate. Scale bars:  
8 200  $\mu$ m. **b**, HES7 reporter activities in murine and human PSM in time-lapse imaging.  
9 Kymographs indicate the spatio-temporal signals along the line between the point A and  
10 B. Scale bars: 400  $\mu$ m. See also Supplementary Video 1. **c**, Oscillatory HES7 reporter  
11 activity measured with a luminometer. Original (top) and detrended (bottom) signals of  
12 three independent experiments. **d**, Overlay of mean murine and human signals shown in  
13 c. **e**, Oscillation periods estimated from c. **f**, Effects of NOTCH signaling on the  
14 oscillation periods. Murine or human PSM were treated with NOTCH inhibitor DAPT  
15 (10  $\mu$ M). Representative of three independent experiments. **g**, Periods estimated from f  
16 and Supplementary Fig. 1b. **h**, Time-lapse imaging of single cells. Mouse PSM cells were  
17 sparsely split, and the oscillatory HES7 reporter activity in a single cell was monitored.  
18 See also Supplementary Video 2. Ph: Phase image; Luc; Luciferase image. Scale bar: 20  
19  $\mu$ m. **i**, Periods of single murine and human PSM cells estimated from Supplementary Fig.  
20 2b, c. All p-values are from two-sided student's t-test.

21

22 **Figure 2 Effects of sequence differences between murine and human HES7 loci on**  
23 **the oscillation period**

24 **a**, Swapping of the human and murine HES7 loci with CRISPR/Cas9-mediated  
25 homologous recombination. The HES7 locus was defined as the region ranging from the  
26 end of 3'UTR of the adjacent gene, PER1, to the end of 3'UTR of HES7. **b**, Southern  
27 blotting of mouse ESCs containing the human HES7 locus with probes against murine  
28 (left) and human (right) HES7 sequences. Wt: mouse HES7/mouse HES7; Hetero swap:  
29 human HES7/mouse HES7; Homo swap: human HES7/human HES7. **c**, Oscillatory  
30 HES7 reporter activity in mouse PSM containing the human HES7 locus. Mean of three  
31 independent experiments. **d**, Periods estimated from Supplementary Fig. 4a. The period  
32 of wild-type human PSM shown in Fig. 1e is displayed as a control. P-values are from  
33 two-sided Dunnett's test. **e**, Phenotypes of the knock-in mice containing the human HES7  
34 locus. Four-week old mice were scanned with  $\mu$ CT. **f**, **g**, *Ex vivo* tail bud cultures of the  
35 mouse embryos containing the human HES7 locus. The tail buds of E10.5 mouse embryos  
36 were cultured (f), and the oscillatory HES7 reporter activity was monitored (g). Signals



1 were averaged within the yellow circle, and a representative of three independent  
2 experiments is shown. **h**, Periods estimated from g and Supplementary Fig. 4b. P-value  
3 is from two-sided paired t-test. **i-o**, Knock-out (KO) and rescue assay. **j, m**, Endogenous  
4 HES7 genes were knocked out in murine (j) and human (m) cells to disrupt HES7  
5 oscillation. **k, n**, The disrupted oscillations were rescued with either an exogenous  
6 construct containing a promoter, exons, introns, and UTRs of mouse HES7 (mHES7) or  
7 human HES7 (hHES7). Mean of three independent experiments. The mean data of KO  
8 shown in j, m are displayed as a control. **l, o**, Periods estimated from Supplementary Fig.  
9 4c. P-values are from two-sided student's t-test.

10  
11 **Figure 3 Measuring biochemical parameters of HES7 that determine the oscillation**  
12 **period**

13 **a**, Schematic representation of the negative feedback loop of HES7. The biochemical  
14 parameters that determine the oscillation period, i.e., delays and degradation rates, were  
15 measured in the indicated panels.  $\tau_{TX}$ : Transcription delay;  $\tau_{In}$ : Intron delay;  $\tau_{TI}$ :  
16 Translation delay;  $\tau_{Rp}$ : Repression delay;  $\delta_m$ : Degradation rate of mRNA;  $\delta_p$ : Degradation  
17 rate of protein. **b**, Degradation assay of HES7. The transcription of the fusion construct  
18 of HES7 and NanoLuc (NLuc) was halted upon Doxycycline (Dox) addition at  $t = 0$  (top),  
19 and the decay of NLuc signal was monitored (bottom). Either mouse HES7 or human  
20 HES7 sequence was used in murine or human PSM. Mean of three independent  
21 experiments. **c**, Inverse degradation rates of HES7 protein estimated from Supplementary  
22 Fig. 6a. **d**, Expression delay assay of HES7. The transcription of HES7-NLuc construct  
23 was induced upon Dox addition at  $t = 0$  (top), and the onset of NLuc signal was monitored  
24 in either murine or human PSM (bottom). **e**, Fitting of the HES7 degradation data shown  
25 in b (Mouse HES7 in mouse PSM and Human HES7 in human PSM) (top) and fitting of  
26 HES7 expression delay shown in d (Ex1) (bottom). **f**, Transcription/translation delays of  
27 HES7 (top) and inverse degradation rates of Hes7 mRNA (bottom) estimated from e and  
28 Supplementary Fig. 6b. **g, h**, Intron delay assay of HES7. Three reporter constructs were  
29 used (h). Stop: stop codon. Dual reporter assays with NLuc and Firefly luciferase (FLuc)  
30 were performed (g, top), and the cross correlation functions of NLuc and FLuc signals  
31 were calculated (g, bottom) in either murine or human PSM. Mean of three independent  
32 experiments. **i**, Intron delays of HES7 estimated from Supplementary Fig. 7. **j**, Repression  
33 delay assay of HES7. The transcription of HES7-NLuc was induced upon Dox addition  
34 at  $t = 0$ , and the induced HES7 protein repressed the transcription of the FLuc reporter in  
35 either murine or human PSM (top). Fitting of the repression data with the parameter  
36 repression delay = 0 (bottom). Mean of three independent experiments. **k**, Simulating

1 HES7 oscillations with measured biochemical parameters. Hill coefficient  $n = 3$ . The  
2 other parameters are summarized in Supplementary Table 1. **l**, Periods estimated by  
3 computing the power spectra of simulated oscillations with different values of repression  
4 Hill coefficient. All p-values are from two-sided student's t-test.

5  
6 **Figure 4 Generality of slower biochemical reactions in human cells**

7 **a, b**, Degradation assay of other genes expressed at the PSM stage. The transcription of a  
8 gene of interest (GOI) fused with NLuc was halted upon Dox addition at  $t = 0$  (b), and  
9 the decay of NLuc signal was monitored in either murine or human PSM (a). **c**, Inverse  
10 protein degradation rates of other PSM marker genes estimated from Supplementary Fig.  
11 9. The HES7 degradation rate shown in Fig. 3c is displayed as a control. **d, e**, Expression  
12 delay assay of other genes expressed at the PSM stage. The transcription of FLuc-GOI  
13 fusion construct flanked by a stop codon was induced upon Dox addition at  $t = 0$  (e), and  
14 the onset of FLuc signal was monitored in either murine or human PSM (d). Note that the  
15 delay measured here is the sum of the transcription delay of the fusion construct, intron  
16 delay of GOI, and translation delay of FLuc. Brachyury T and CDX2 were not used due  
17 to their long introns. **f**, Delays of other PSM genes estimated from Supplementary Fig.  
18 10. **g**, *In vitro* differentiation of NPCs from mouse ESCs and human iPSCs. PAX6 is a  
19 neural marker gene. Scale bars: 200  $\mu\text{m}$ . **h**, Degradation assay in NPCs. The transcription  
20 of GOI-NLuc was halted upon Dox addition at  $t = 0$ , and the decay of NLuc signal was  
21 monitored in either murine or human NPCs. **i**, Inverse protein degradation rates in NPCs  
22 estimated from Supplementary Fig. 11. **j**, Expression delay assay in NPCs. The  
23 transcription of FLuc-GOI fusion construct flanked by a stop codon was induced upon  
24 Dox addition at  $t = 0$ , and the onset of FLuc signal was monitored in either murine or  
25 human NPCs. PAX6 was not used due to its long introns, and HES7 in NPCs was used as  
26 a control. **k**, Delays in NPCs estimated from Supplementary Fig. 12. **l**, Proposed scheme.  
27 Murine and human cells have different cellular environments that affect the speeds of  
28 several biochemical reactions. All p-values are from two-sided student's t-test.

29  
30 **Supplementary Figure 1 Oscillations and synchronization of the segmentation clock**

31 **a**, Scheme of the segmentation clock. HES7 is a transcription repressor that inhibits its  
32 own promoter, giving rise to an oscillatory expression. Oscillations in individual cells are  
33 synchronized through intercellular communications driven by NOTCH signaling. WNT  
34 and FGF signaling pathways also modulate the segmentation clock. **b**, Effects of  
35 inhibiting NOTCH signaling on the HES7 oscillation. The data of Ex2 is also shown in  
36 Fig. 1f.

1

## 2 **Supplementary Figure 2 Oscillation in a single cell**

3 **a**, Time-lapse imaging of single cells. Human PSM cells were sparsely split, and the  
4 oscillatory HES7 reporter activity in a single cell was monitored. See also Supplementary  
5 Video 2. Scale bar: 20  $\mu\text{m}$ . **b**, Oscillations in eight single mouse cells. **c**, Oscillations in  
6 eight single human cells.

7

## 8 **Supplementary Figure 3 Southern blotting verifying the interspecies genome** 9 **swapping of the HES7 loci**

10 **a**, Mouse ESCs (EB5) containing the human HES7 locus. The cropped version is shown  
11 in Fig. 2b. **b**, Mouse ESCs (TT2) containing the human HES7 locus. Two different lines  
12 of hetero swap (clones 1 and 7) were used for knock-in mouse generation.

13

## 14 **Supplementary Figure 4 HES7 swapping and KO-and-rescue assay**

15 **a**, Oscillatory HES7 reporter activity in mouse PSM containing the human HES7 locus.  
16 Means are shown in Fig. 2c. **b**, *Ex vivo* tail bud cultures of the mouse embryos containing  
17 the human HES7 locus. Repeat experiments of Fig. 2f, g. **c**, Rescue of the oscillation by  
18 either mouse HES7 or human HES7 construct in HES7-knock-out cells. Means are shown  
19 in Fig. 2k, n.

20

## 21 **Supplementary Figure 5 Knock-in mice containing the human HES7 locus**

22 **a**, Phenotypes of swap mice derived from ESC clone 1 shown in Supplementary Fig. 3b.  
23 **b**, Phenotypes of swap mice derived from ESC clone 7 shown in Supplementary Fig. 3b.  
24 The pictures of clone 7 Wt and Homo swap are also shown in Fig. 2e.

25

## 26 **Supplementary Figure 6 Fitting of the degradation rates and delays of HES7**

27 **a**, Fitting of the degradation rate of HES7 protein. Mouse data at 60-90 min and human  
28 data at 100-300 min were used for the fitting. **b**, Fitting of the transcription/translation  
29 delay of HES7 shown in Fig. 3d (Ex2, Ex3). Fitting of Ex1 is shown in Fig. 3e. The same  
30 data of degradation assay as Fig. 3e was used for fitting.

31

## 32 **Supplementary Figure 7 Measurements of the intron delays of HES7**

33 Dual reporter assays and cross correlation functions of NLuc and FLuc signals. Means  
34 are shown in Fig. 3g.

35

## 36 **Supplementary Figure 8 Measurements of the repression delays of HES7**

1 **a**, Measurements of the repression delays of HES7. Means are shown in Fig. 3j. **b**,  
2 Measurements and fitting of the degradation rates of mRNA and protein of FLuc ( $\delta_f$ ,  $\delta_F$ ;  
3 top) and the sum of transcription ( $\tau_{Tx}$ ) and translation ( $\tau_{TIF}$ ) delays of FLuc (bottom).  
4 Mean of three independent experiments. Estimated mouse parameters:  $\delta_f = 0.021$ ,  $\delta_F =$   
5  $0.021$ ,  $\tau_{TxTIF}$  (i.e.,  $\tau_{Tx} + \tau_{TIF}$ ) = 29.3; Estimated human parameters:  $\delta_f = 0.014$ ,  $\delta_F = 0.014$ ,  
6  $\tau_{TxTIF} = 32.1$ .

7

### 8 **Supplementary Figure 9 Measurements of the protein degradation rates of other** 9 **PSM marker genes**

10 Fitting of the protein degradation rates of genes expressed at the PSM stage. Mouse data  
11 at 100-300 min (100-200 min for GBX2) and human data at 200-400 min shown in Fig.  
12 4a were used for the fitting.

13

### 14 **Supplementary Figure 10 Measurements of the delays of other PSM marker genes**

15 Fitting of the delays of gene expressed at the PSM stage. The original data are shown in  
16 Fig. 4d.

17

### 18 **Supplementary Figure 11 Measurements of the protein degradation rates in NPCs**

19 Fitting of the protein degradation rates in NPCs. Mouse data at 50-150 min and human  
20 data at 100-200 min shown in Fig. 4 h were used for the fitting.

21

### 22 **Supplementary Figure 12 Measurements of the delays in NPCs**

23 Fitting of the delays in NPCs. The original data are shown in Fig. 4j.

24

### 25 **Supplementary Text 1 Parameter dependency of simulated oscillation periods**

26

### 27 **Supplementary Table 1 Biochemical parameters of HES7**

28

### 29 **Supplementary Table 2 Genetic constructs**

30

### 31 **Supplementary Video 1**

32 Time-lapse imaging of HES7 reporter activity in murine (left) and human (right) PSM.

33

### 34 **Supplementary Video 2**

35 Time-lapse imaging of HES7 reporter activity of a single PSM cell in a sparse culture.

36

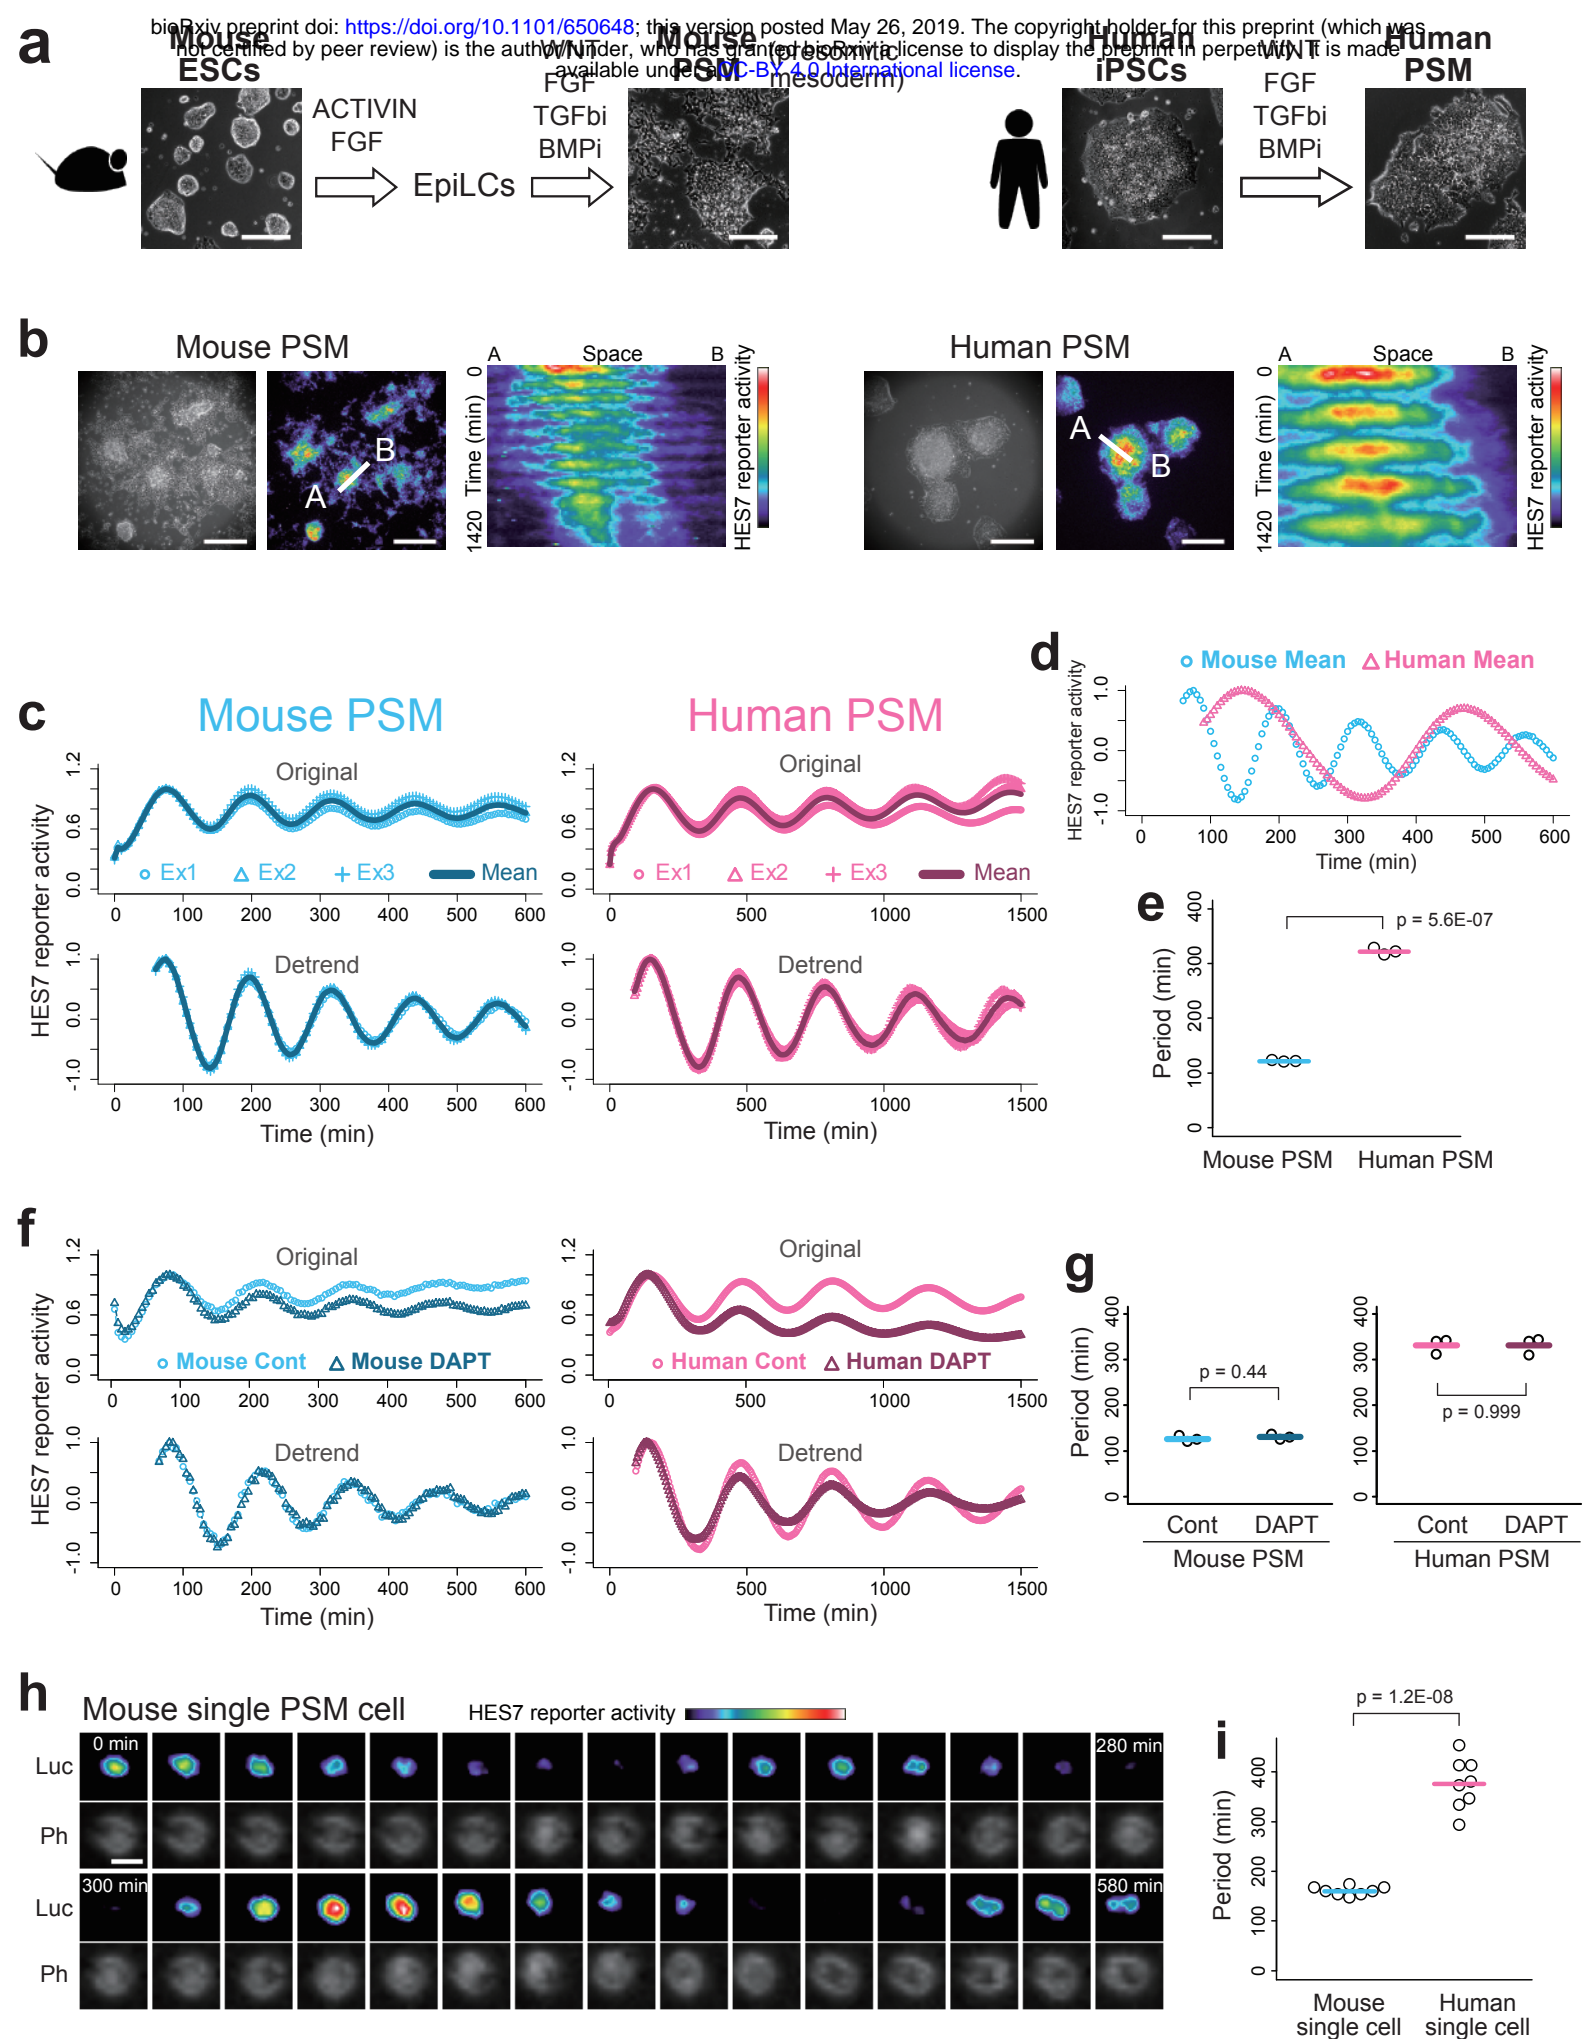

**Fig. 1**



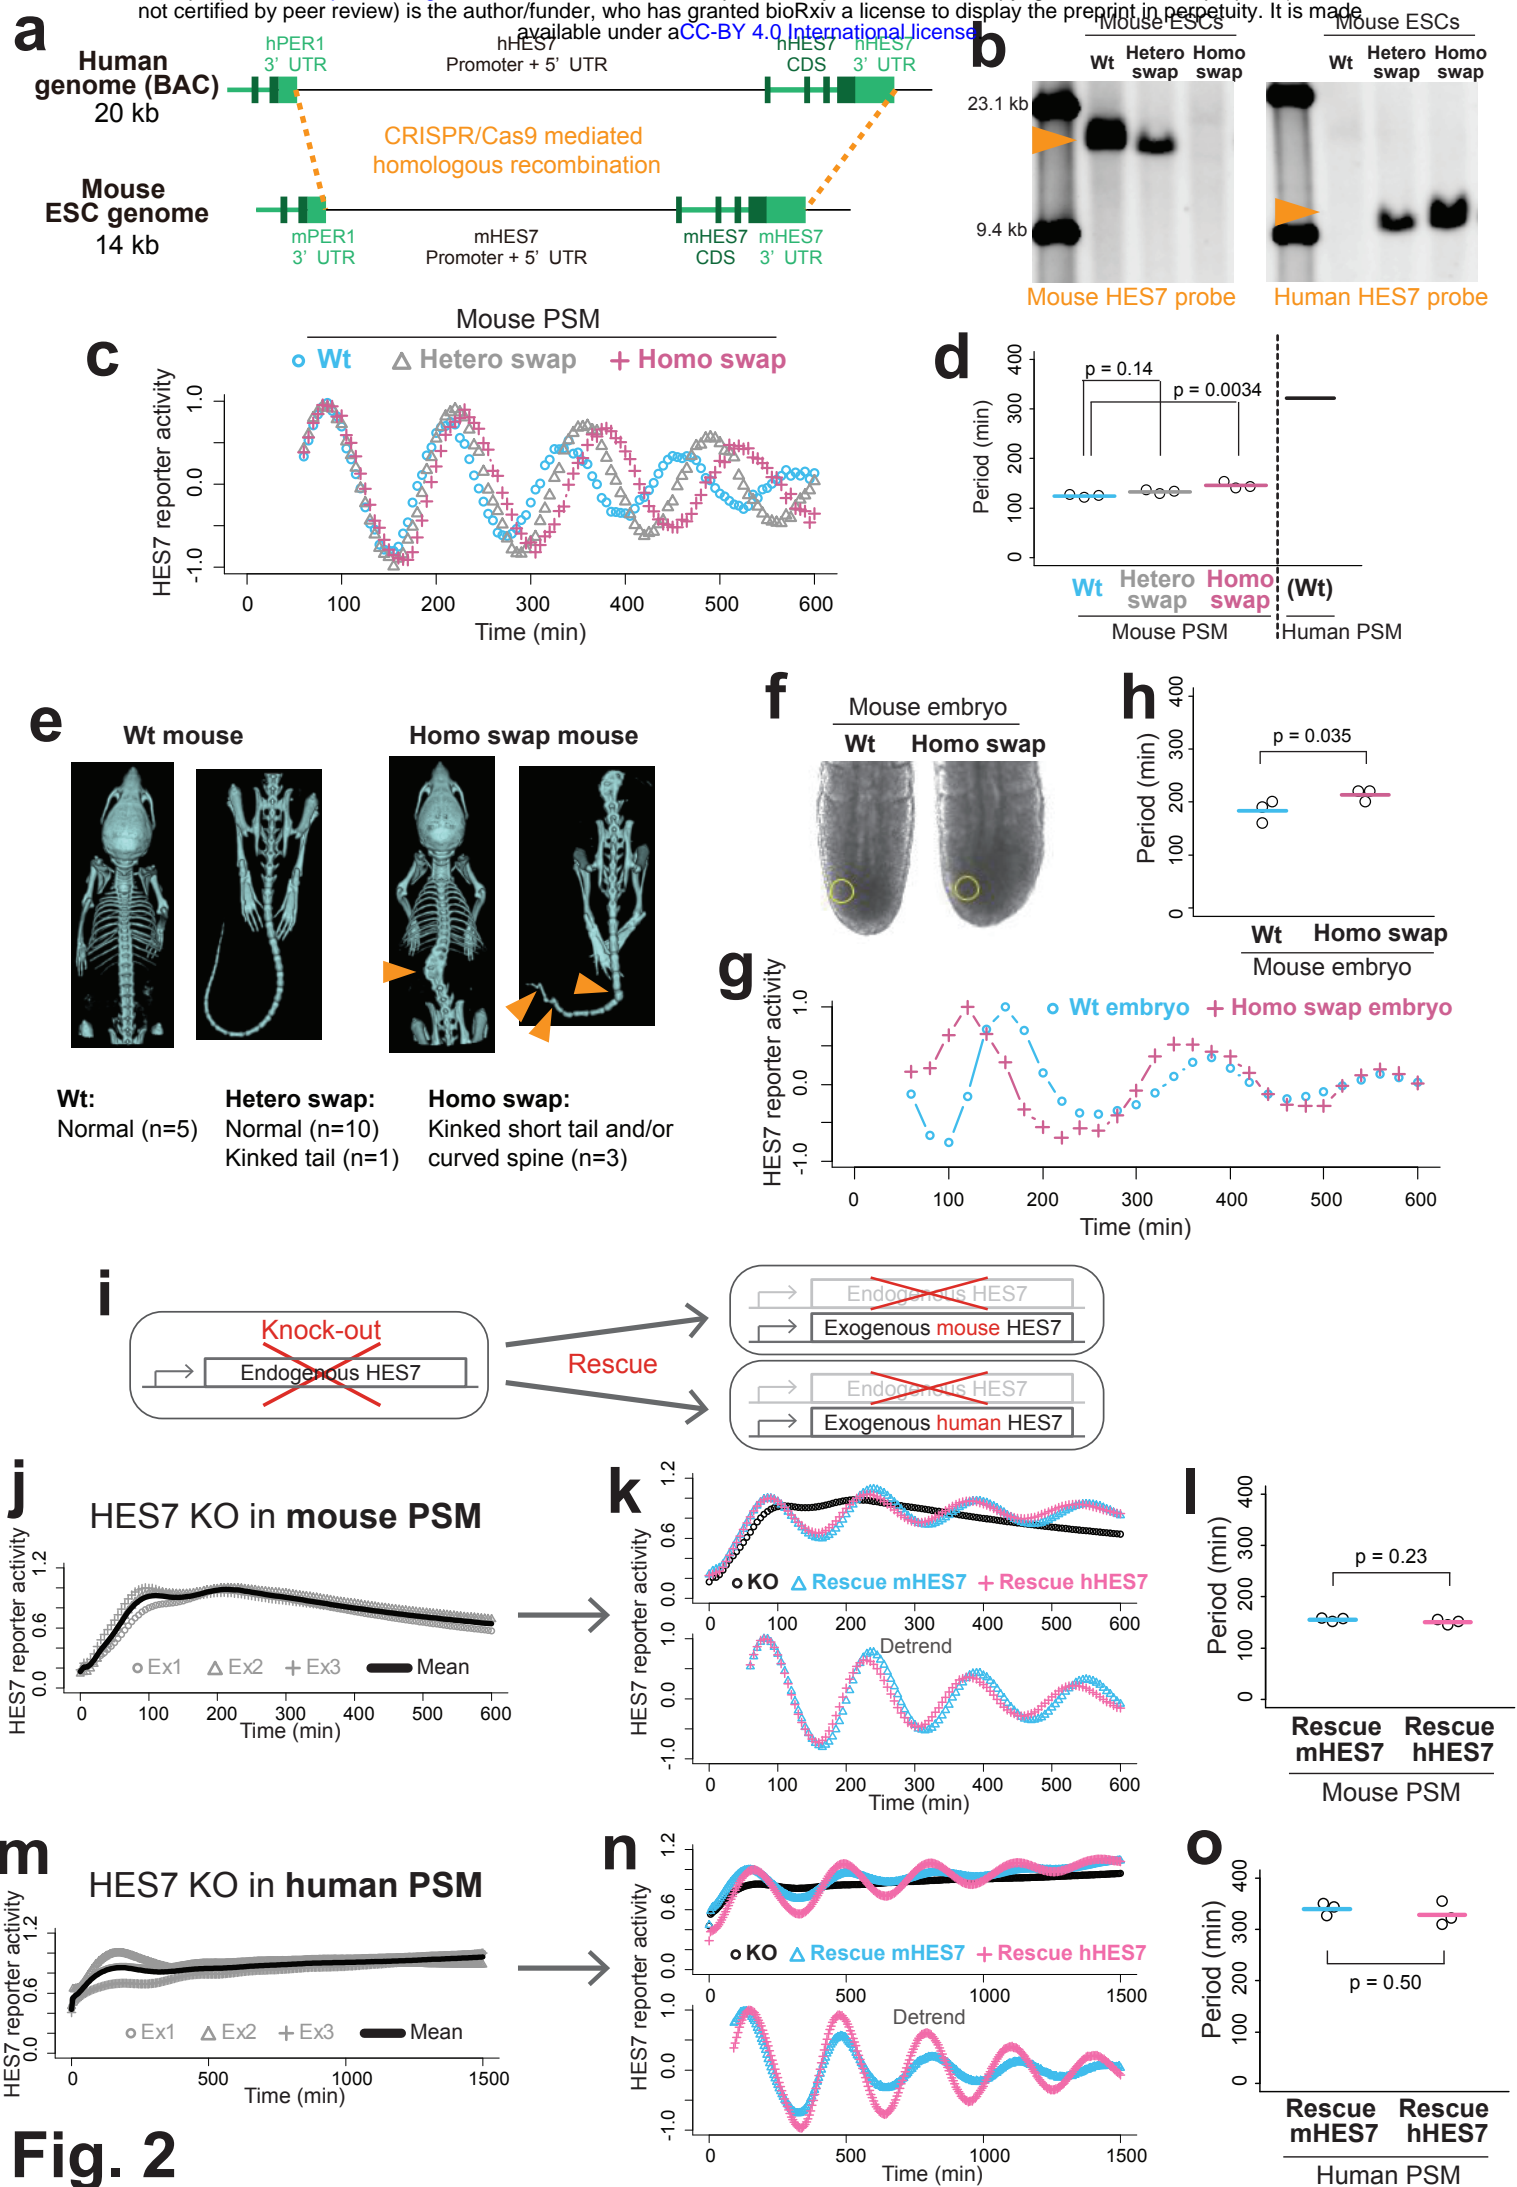

**Fig. 2**



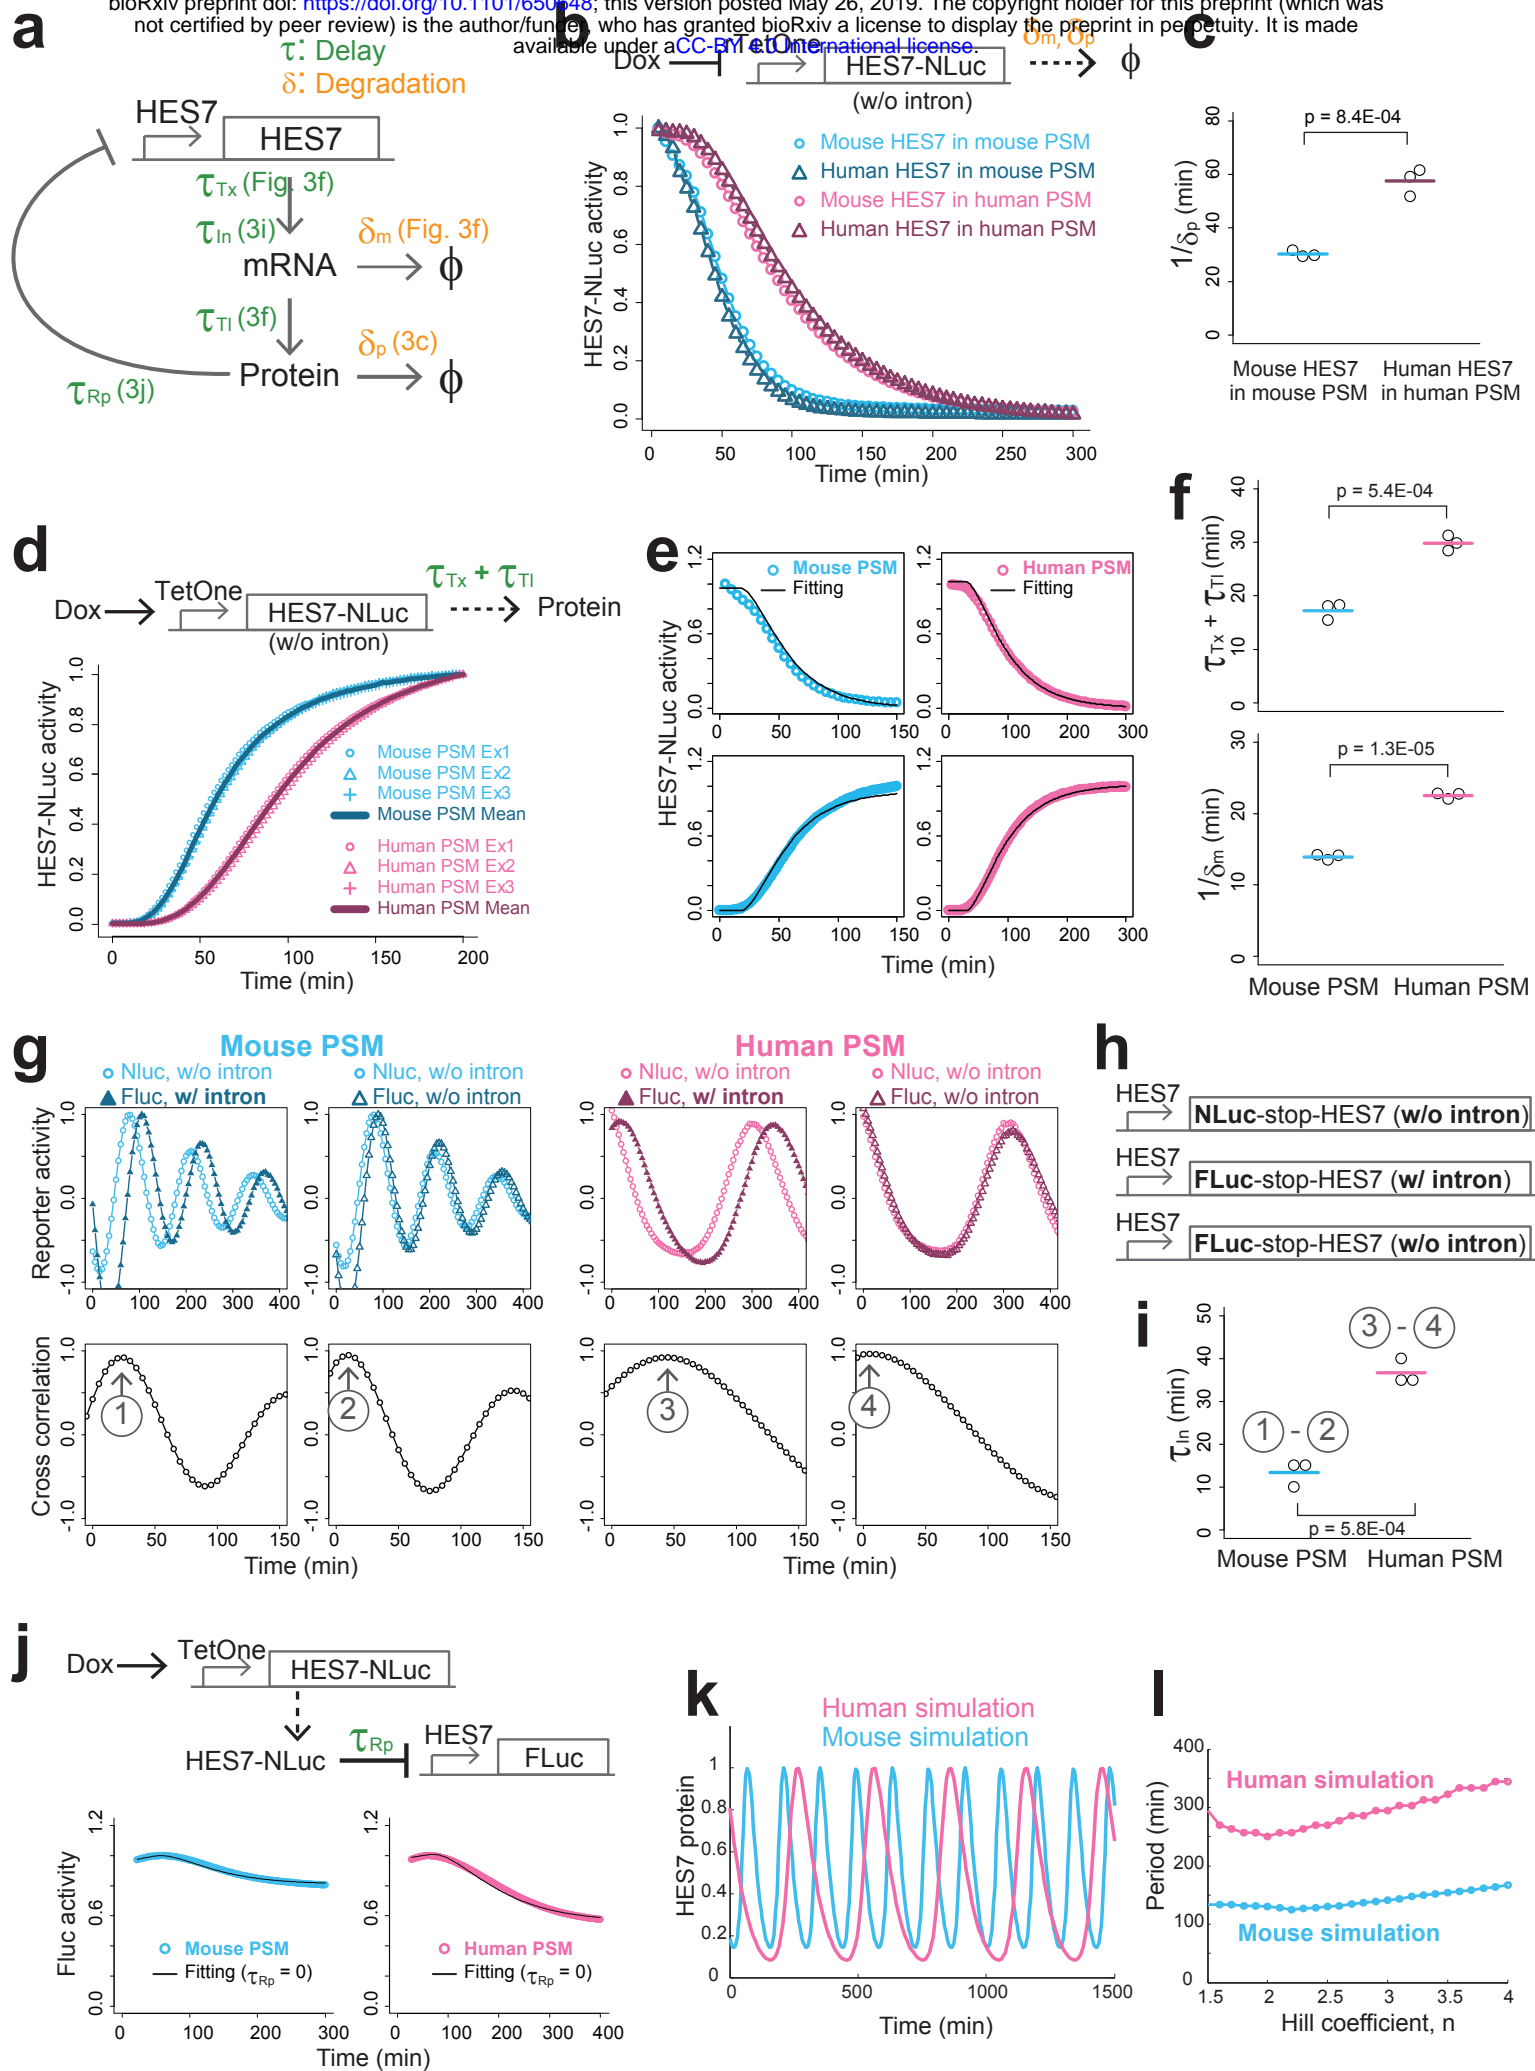

**Fig. 3**

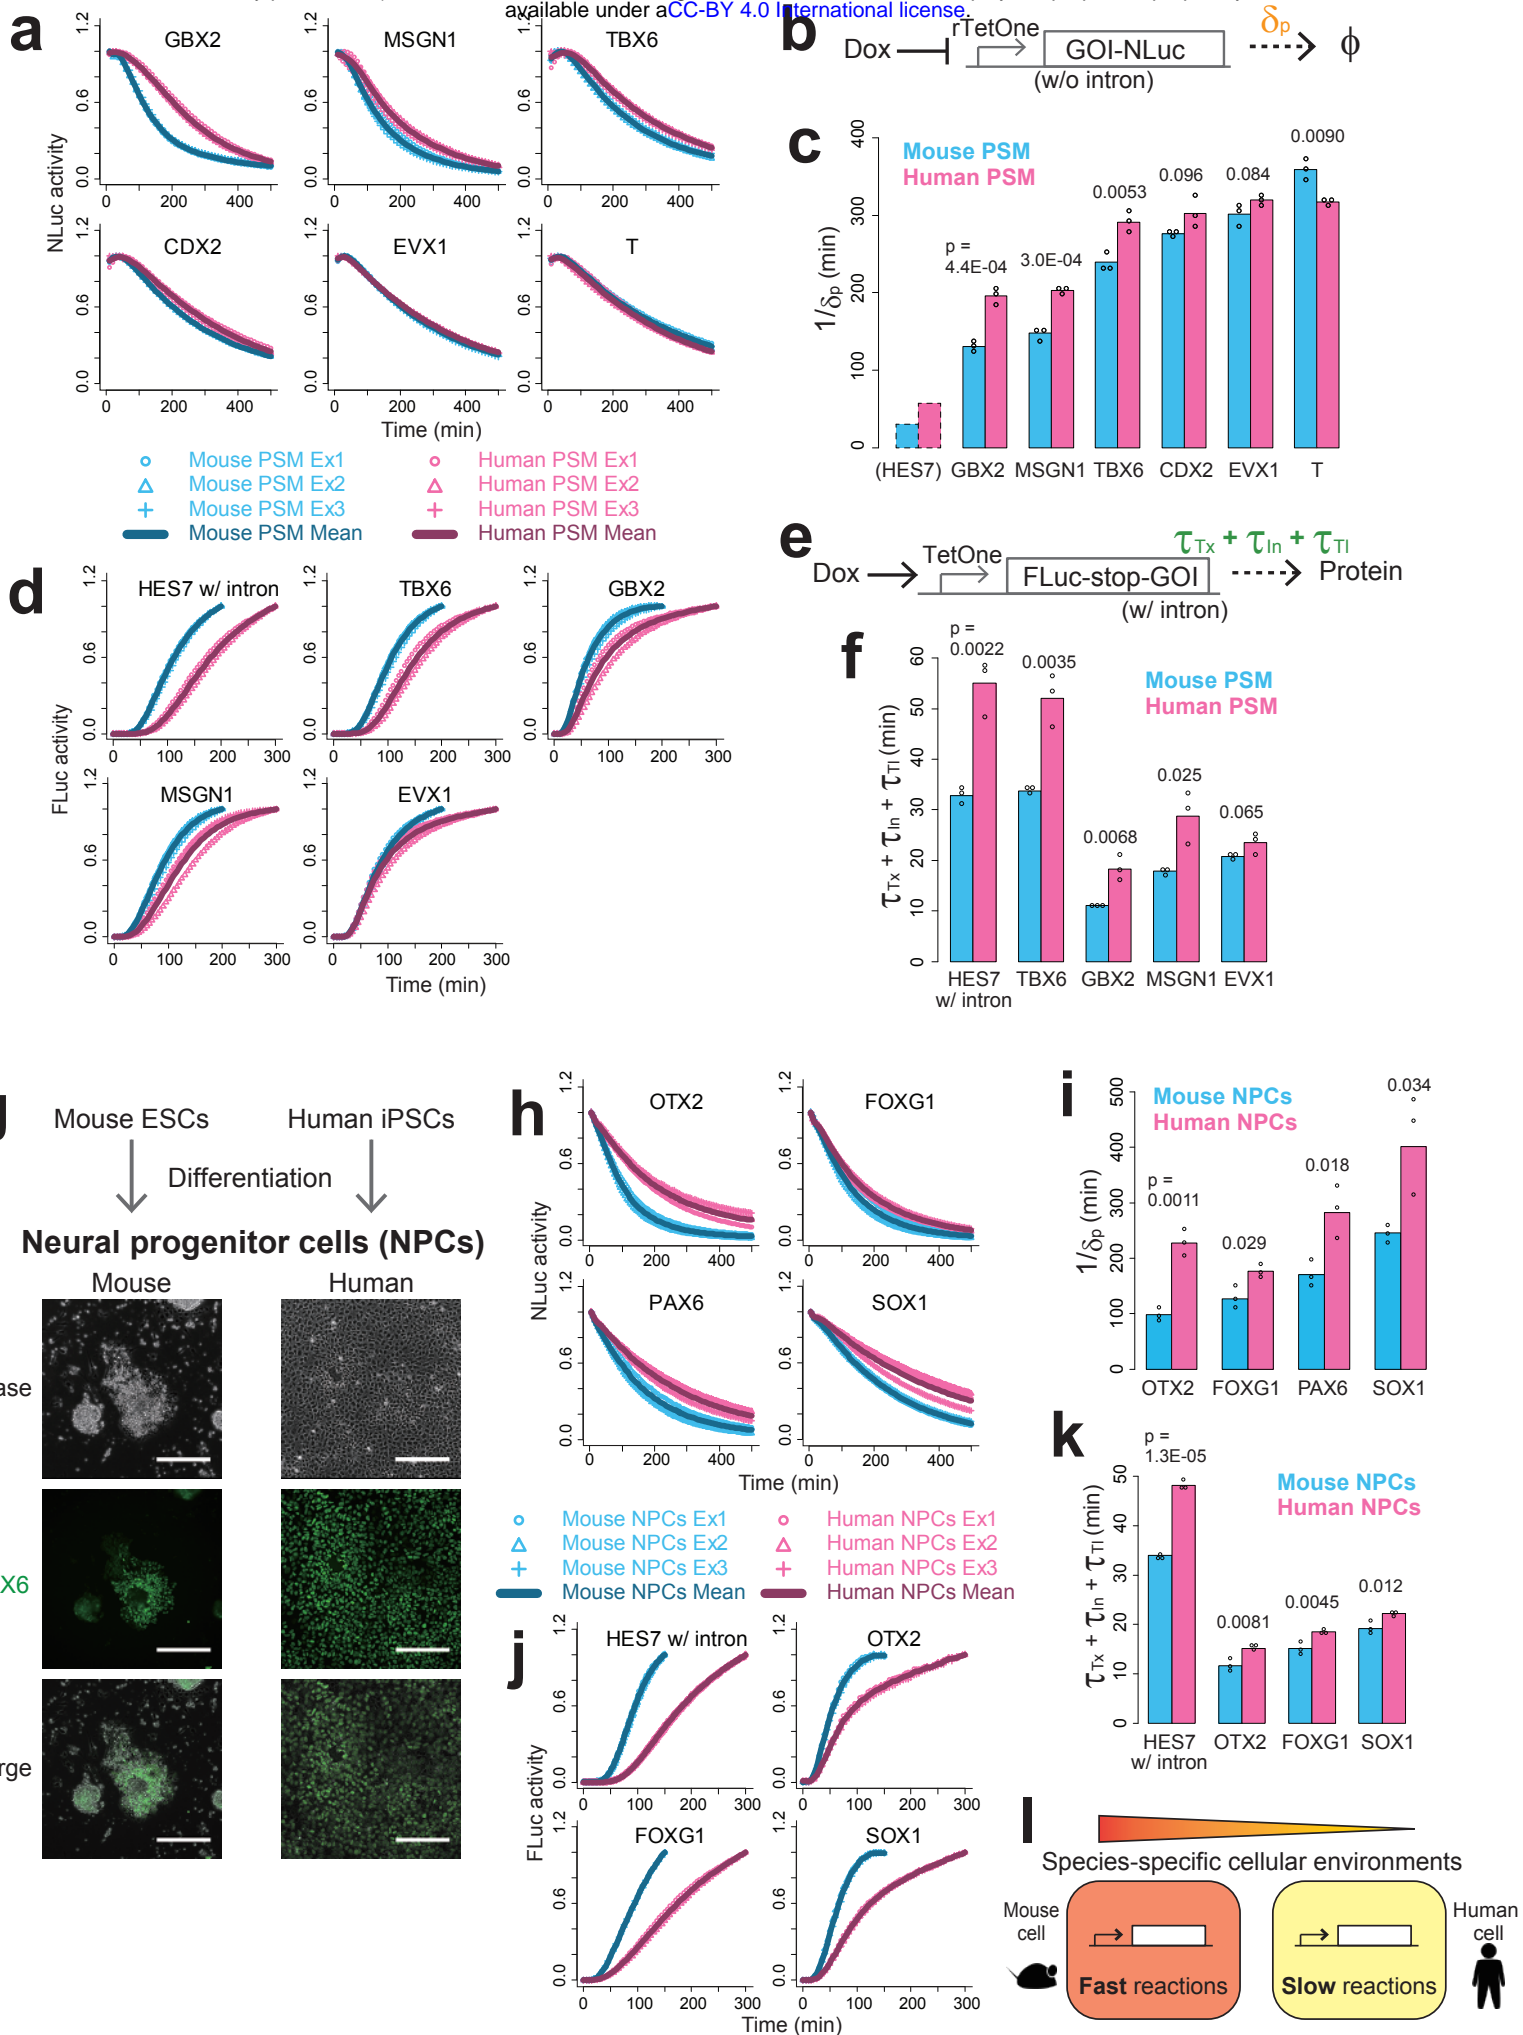

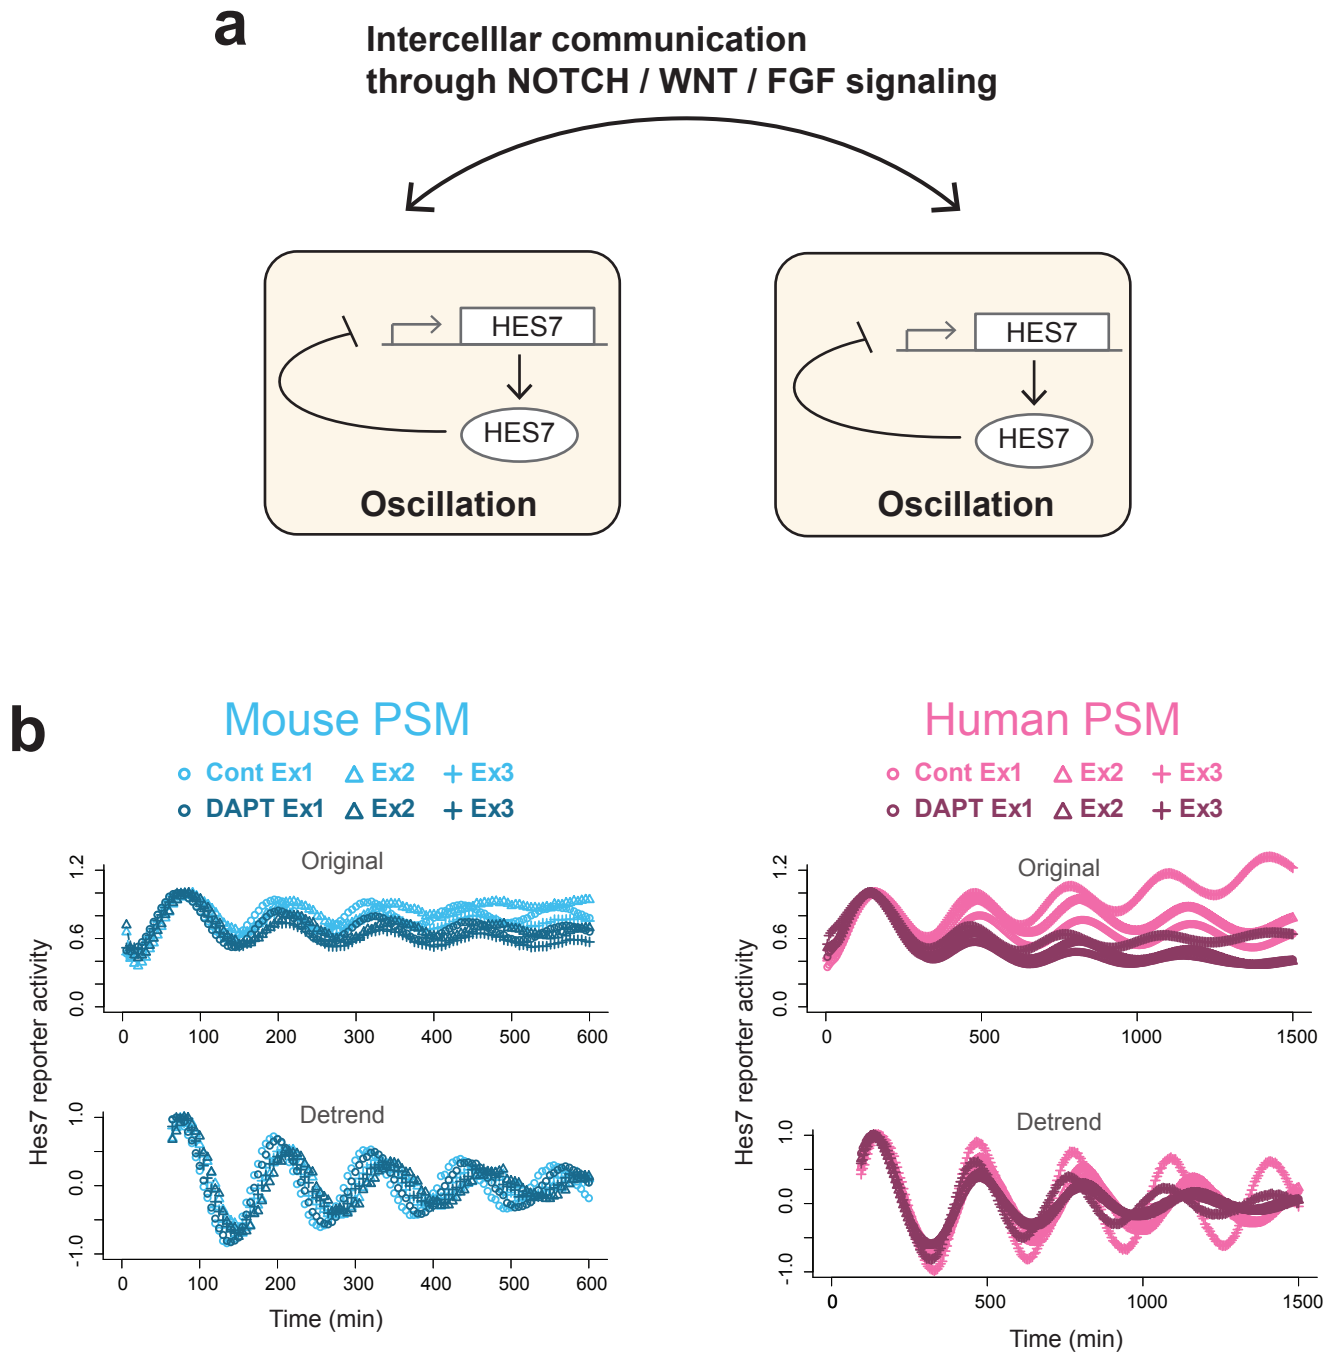

**a**

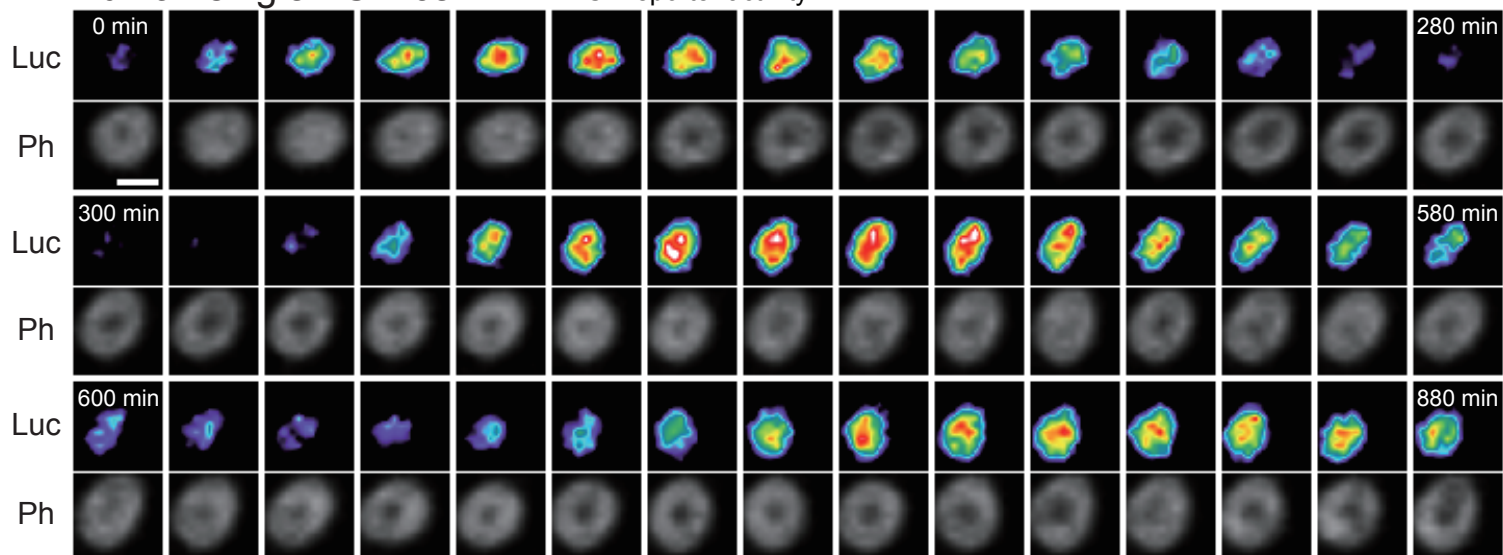

**b**

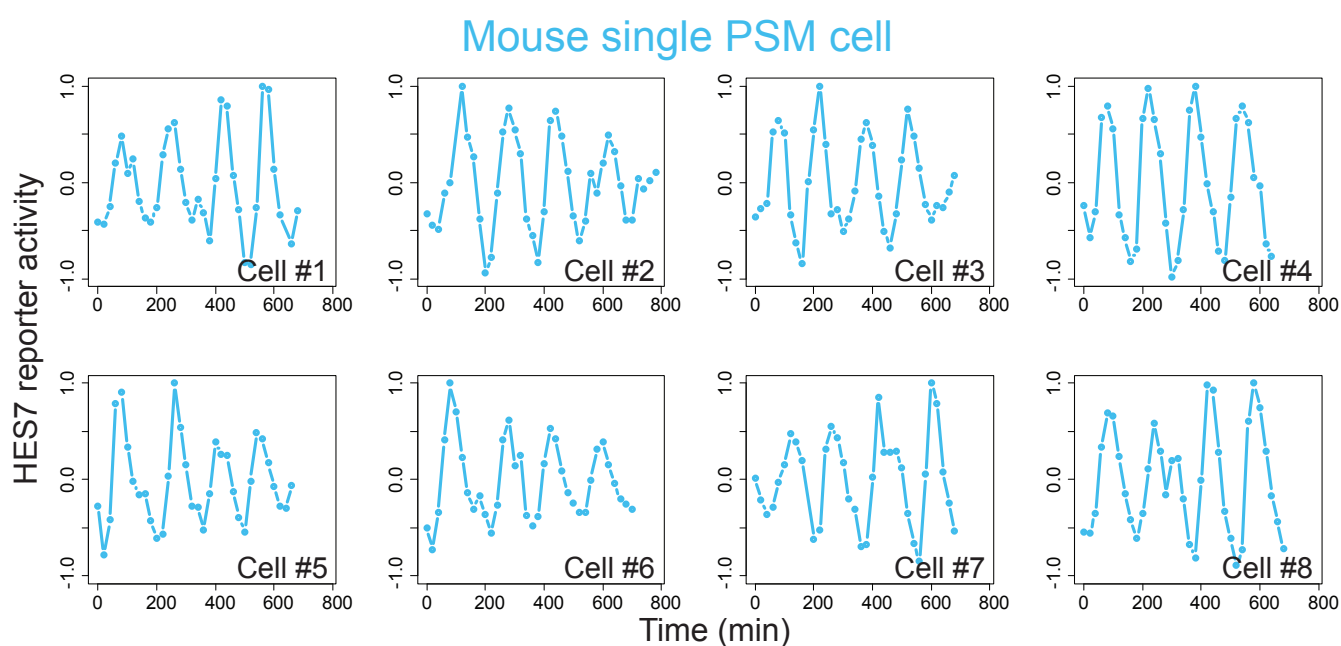

**c**

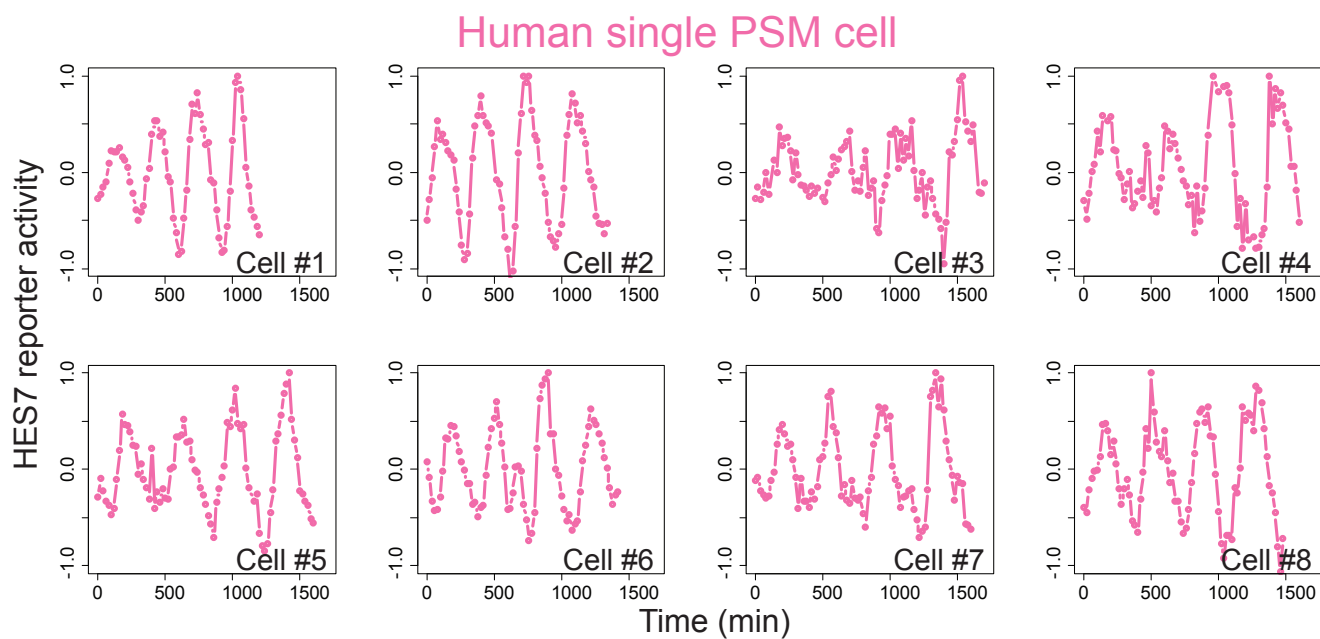

**a** Mouse ESCs (EB5) for PSM induction

**b** Mouse ESCs (TT2) for knock-in mice

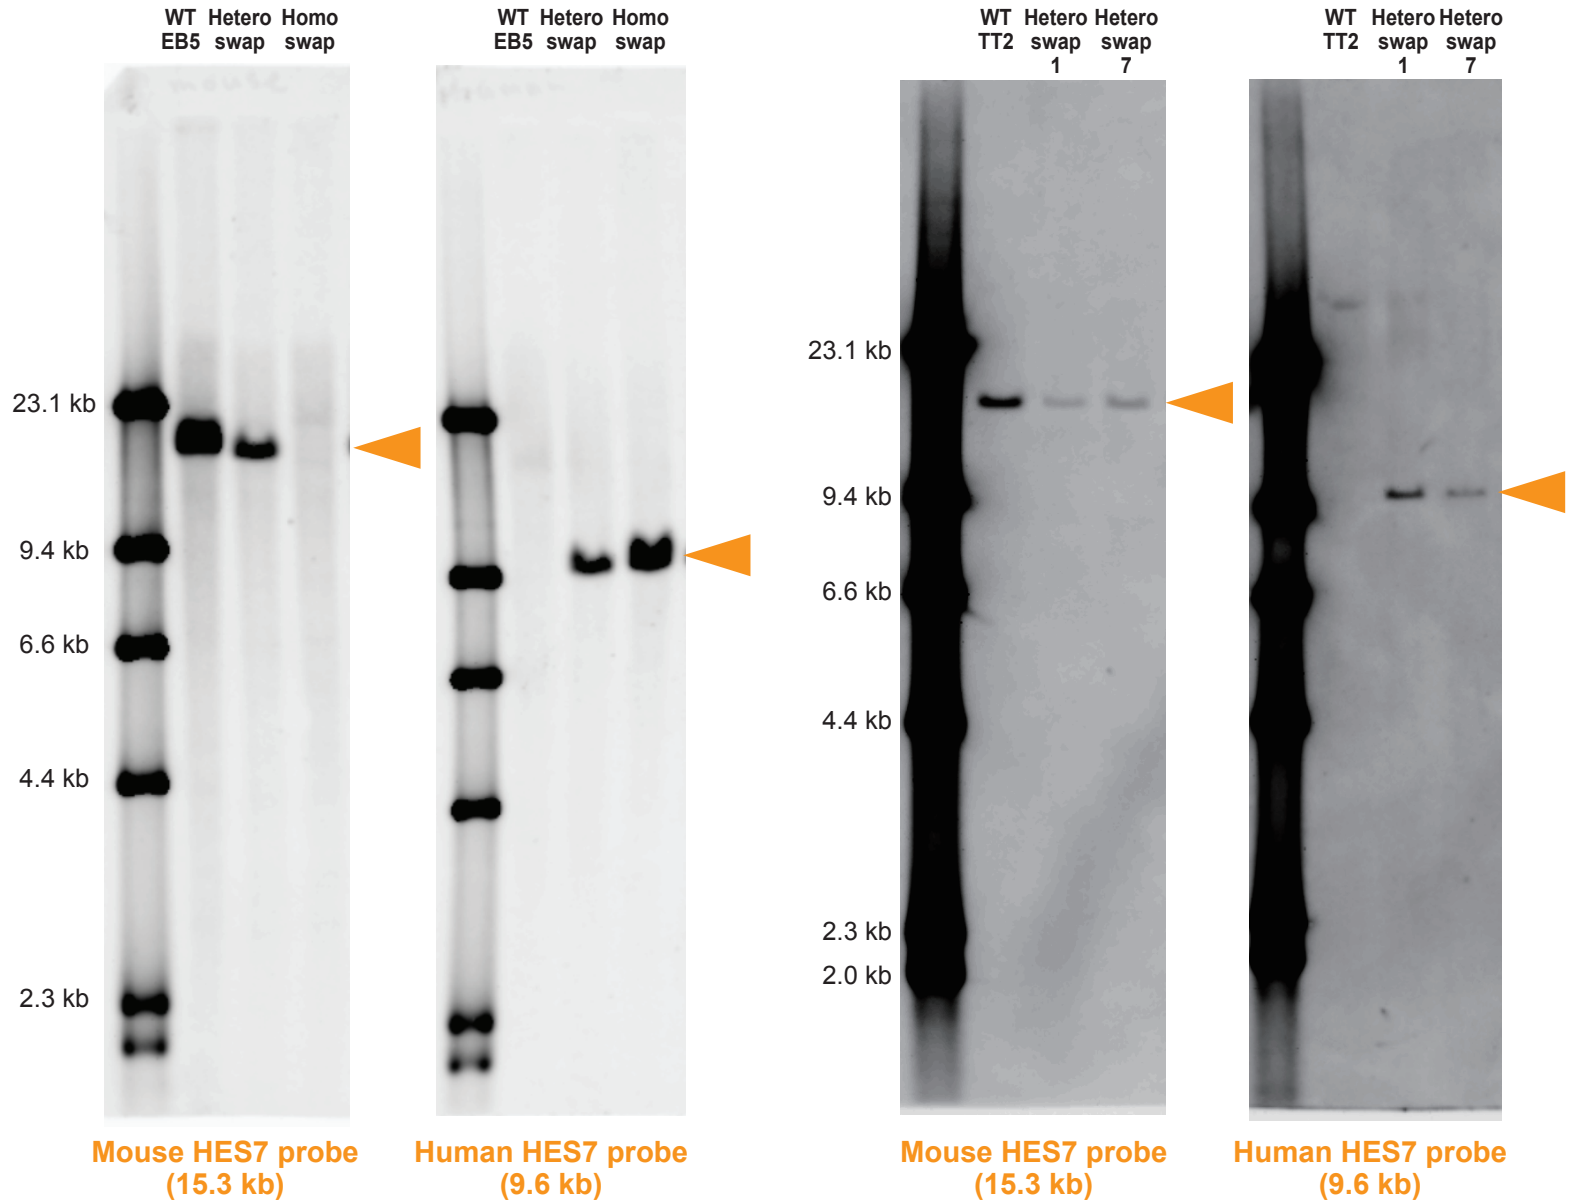



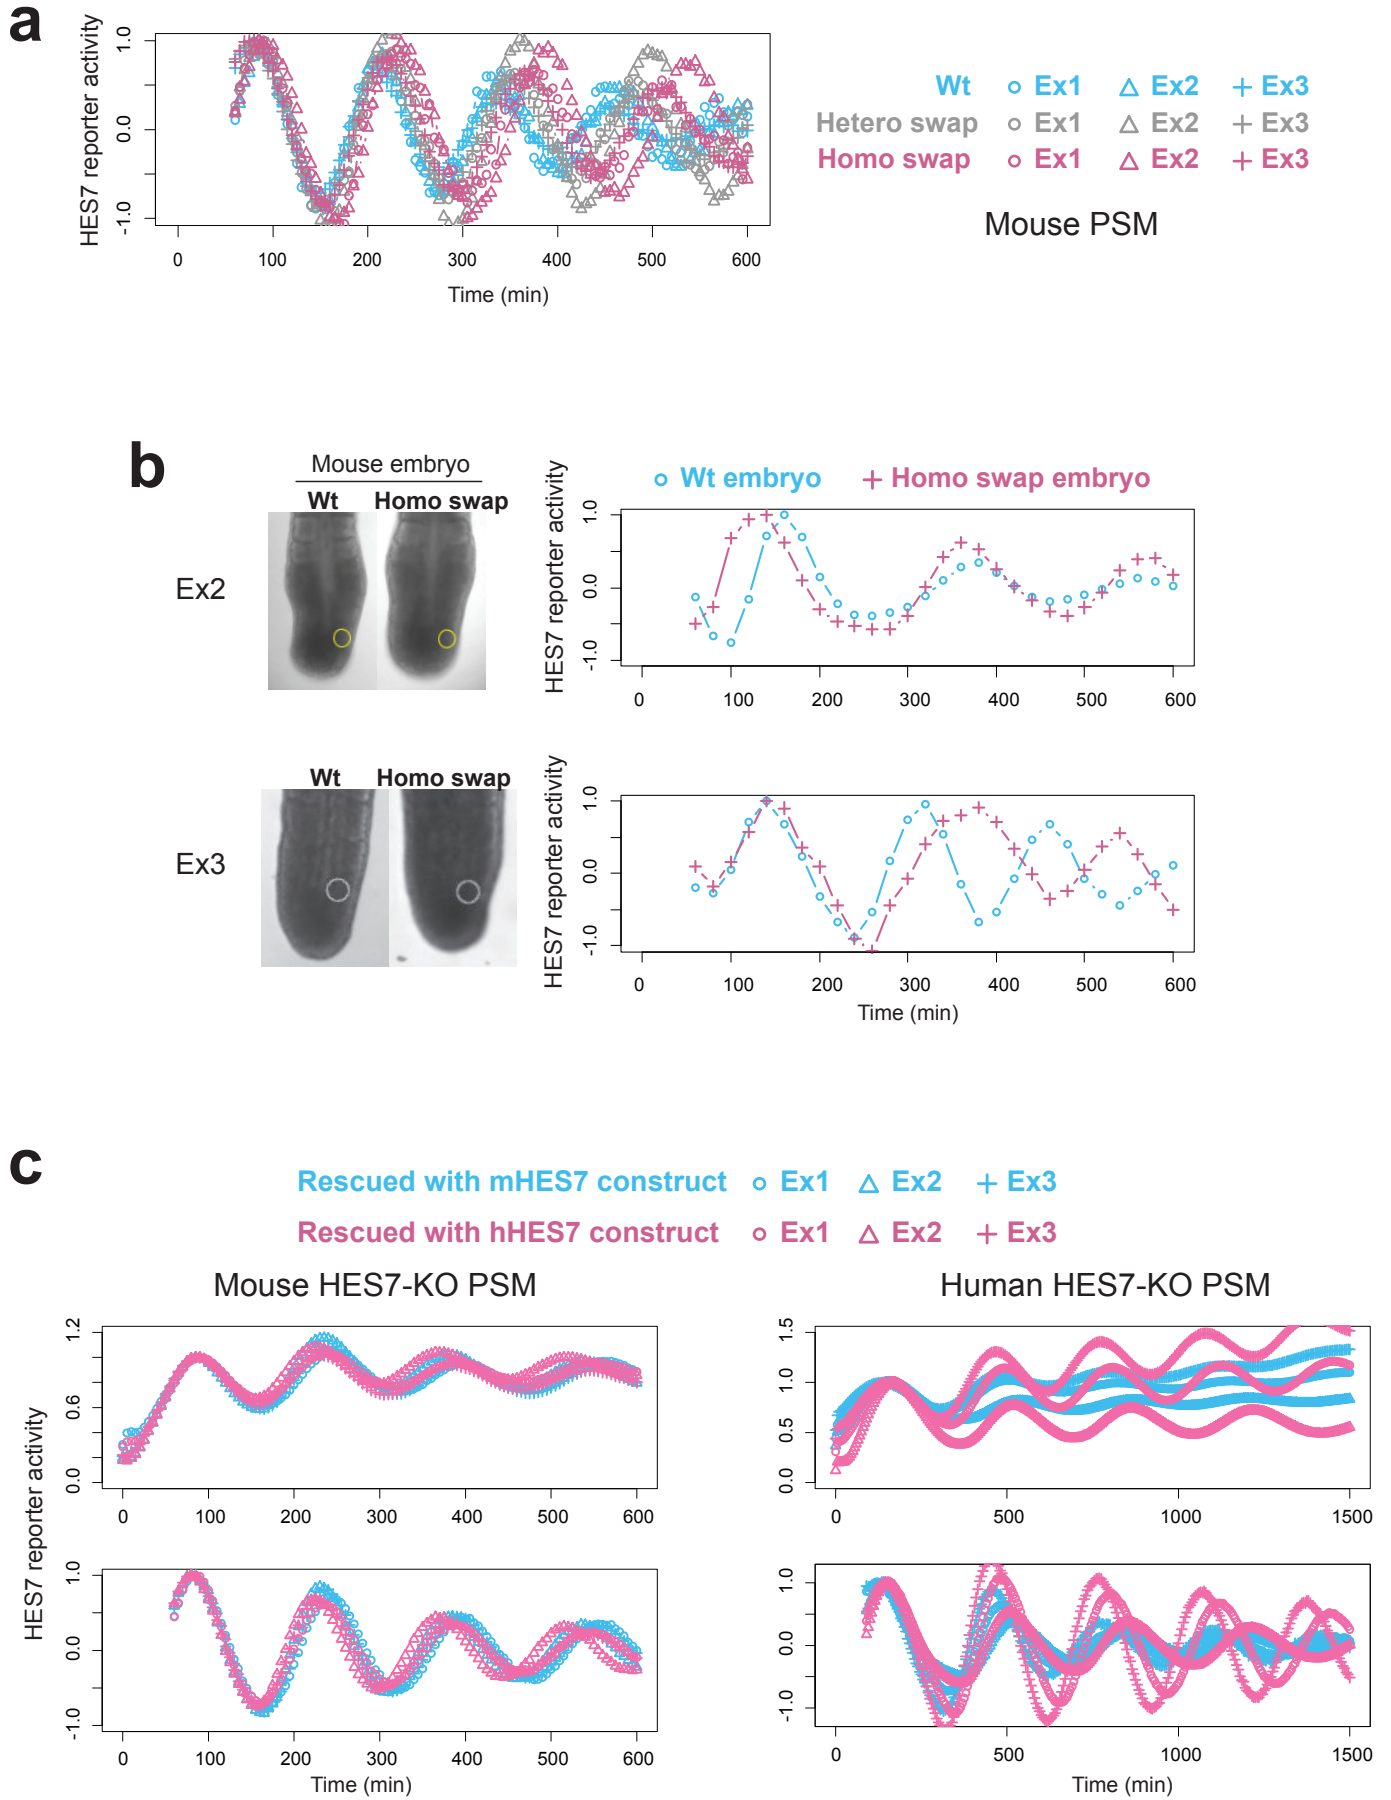

**a** Mice derived from ESC clone 1

**b** Mice derived from ESC clone 7

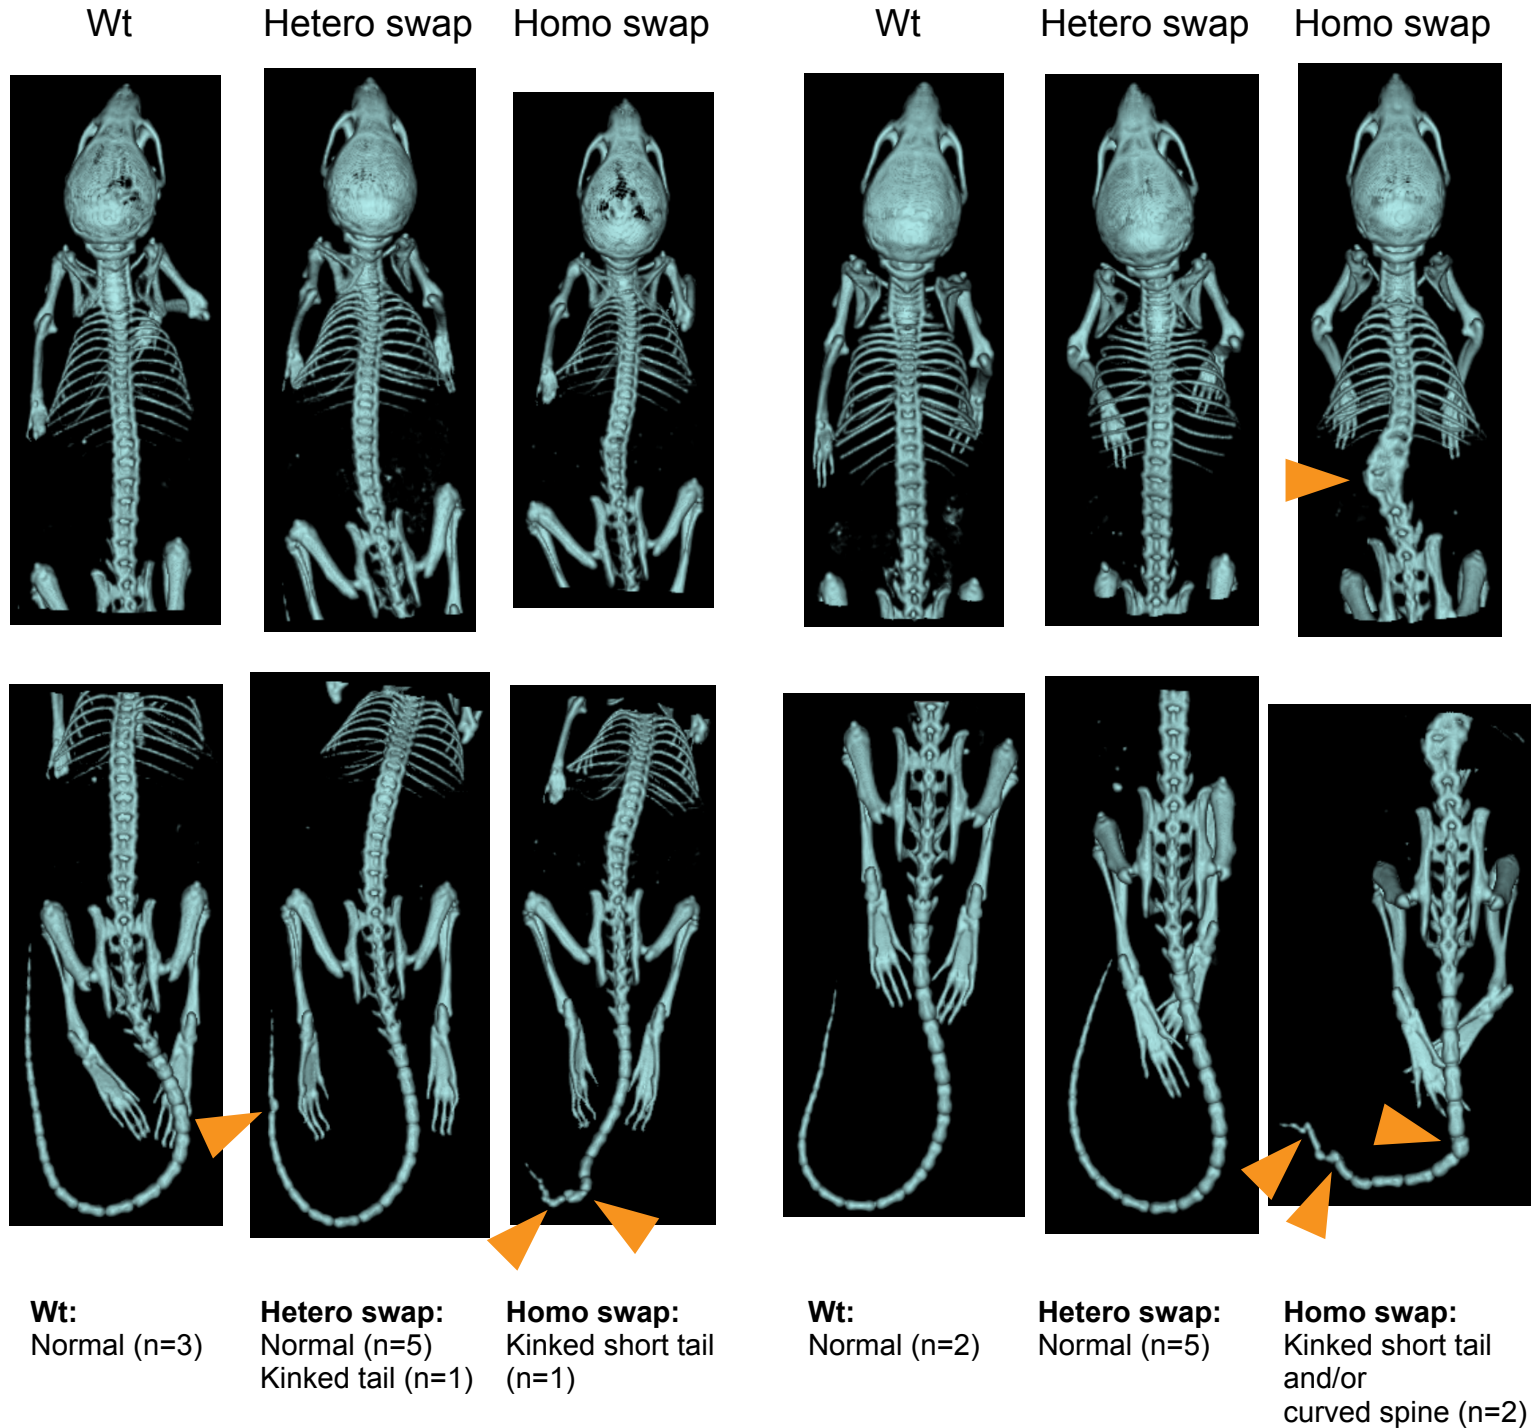



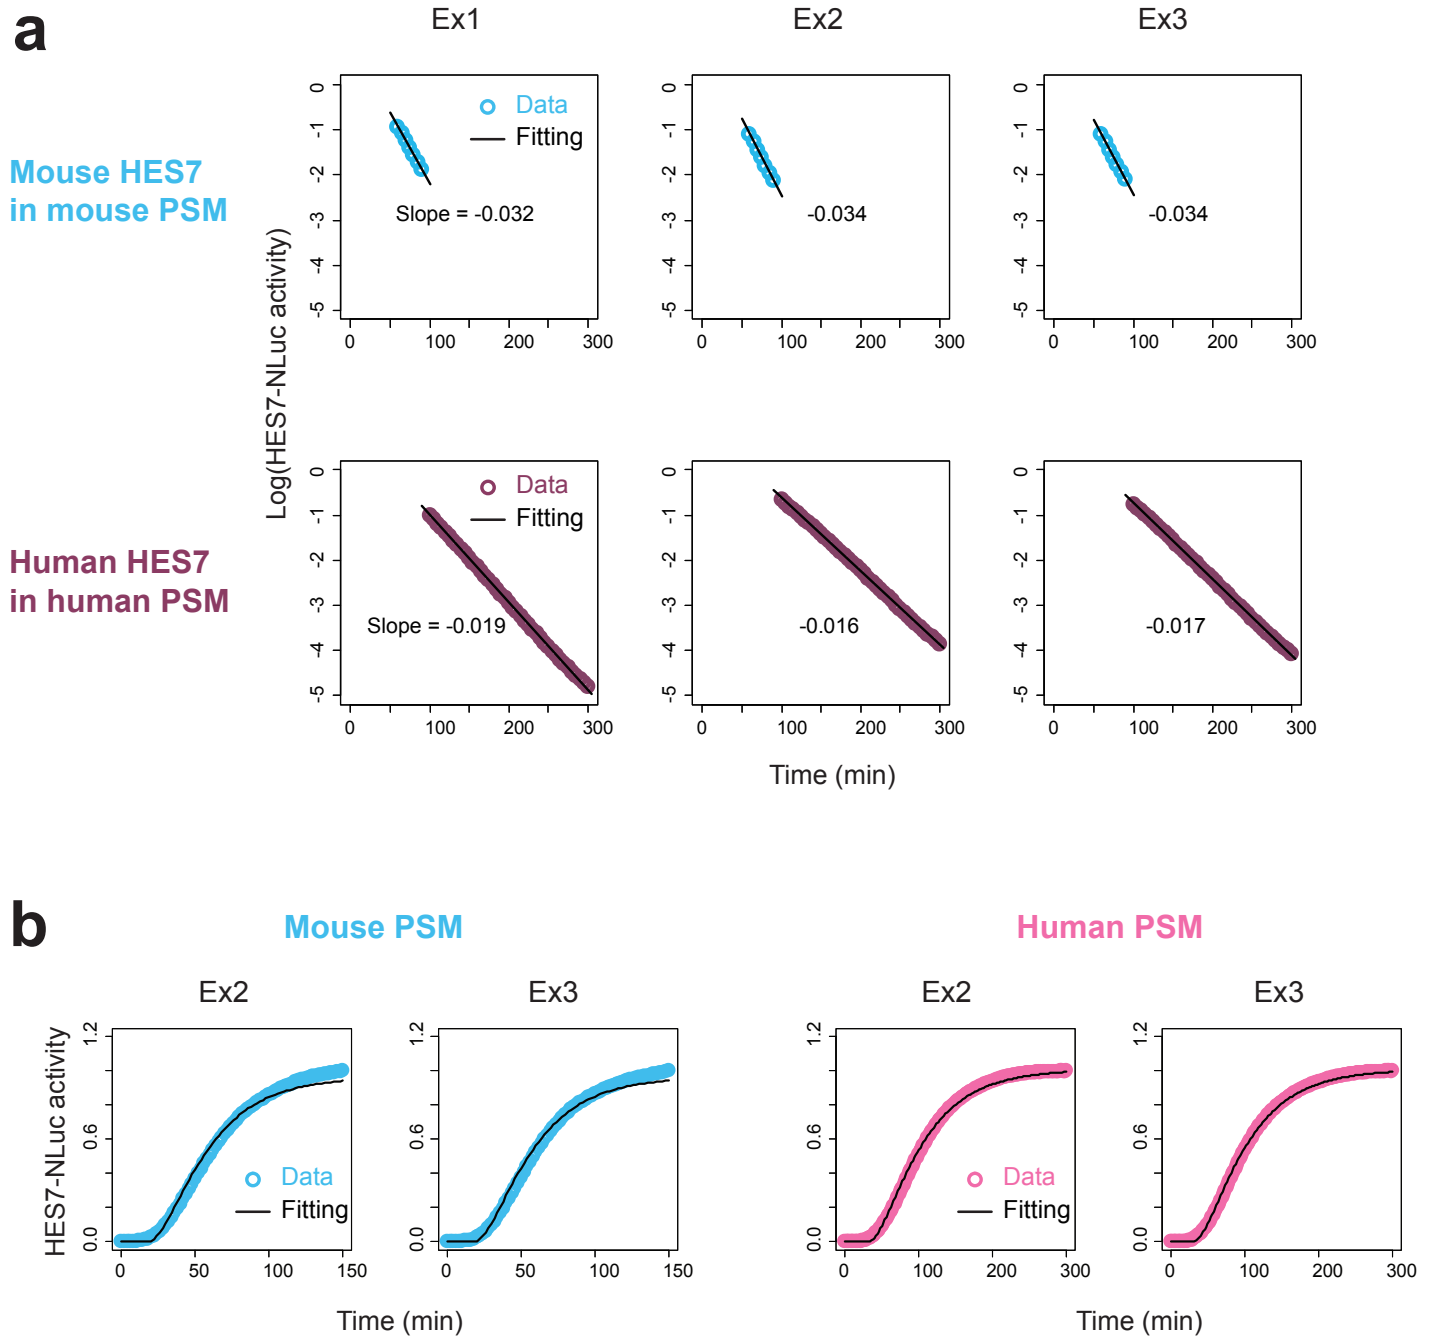

## Mouse PSM

## Human PSM

Experiment\_1

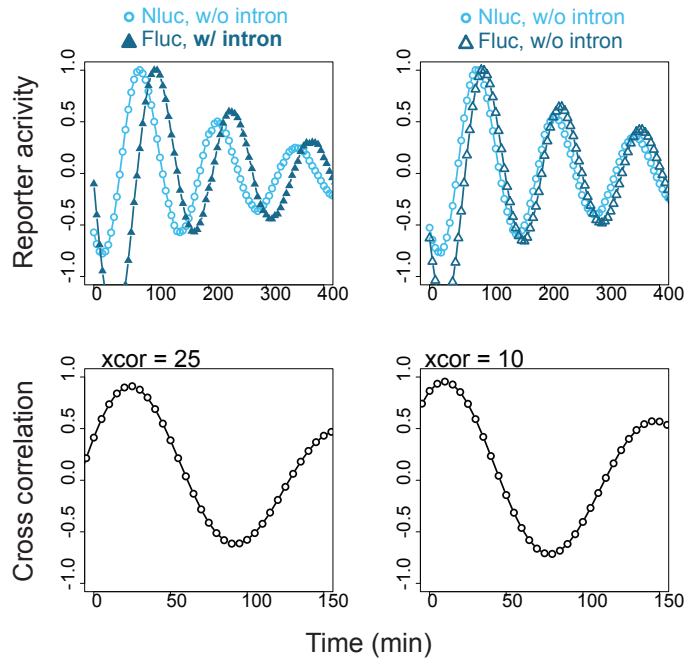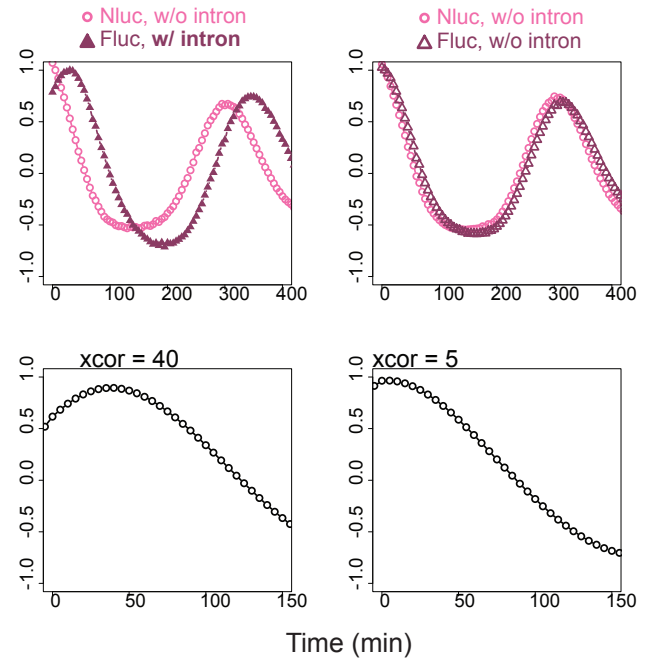

Experiment\_2

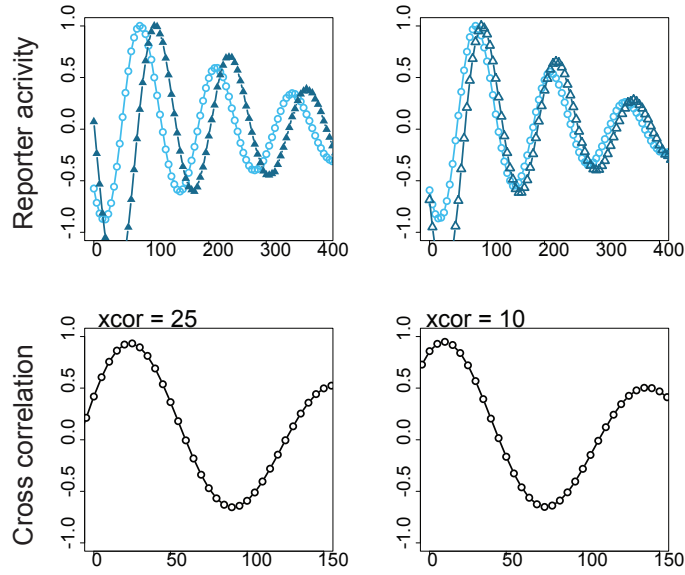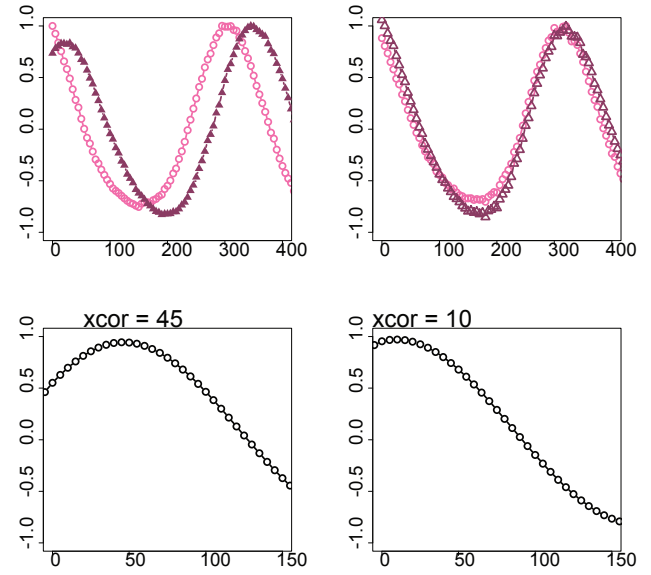

Experiment\_3

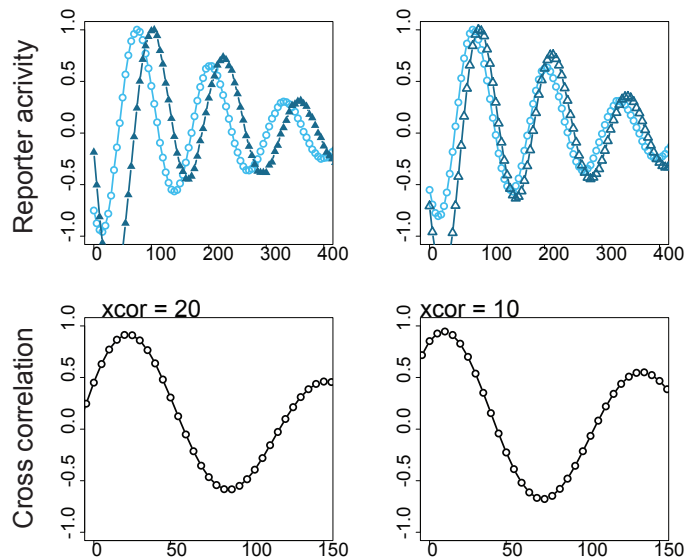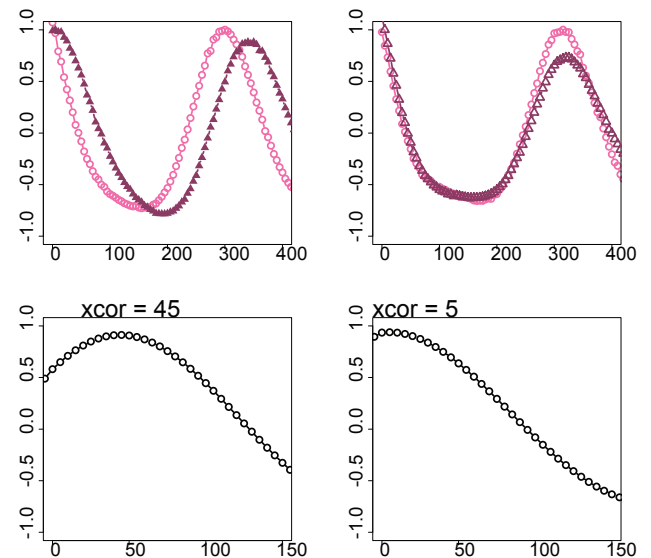

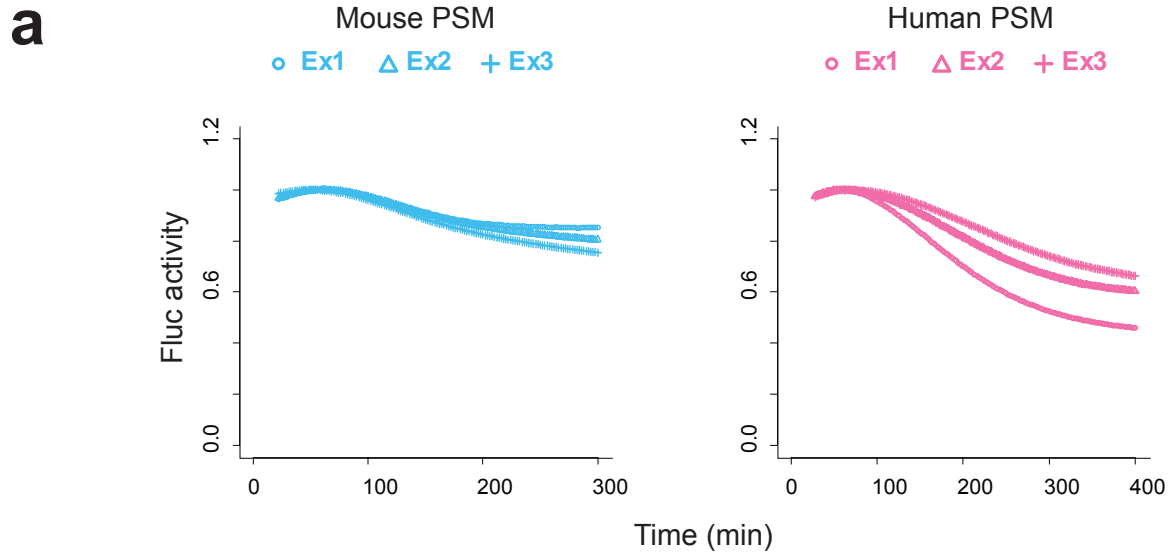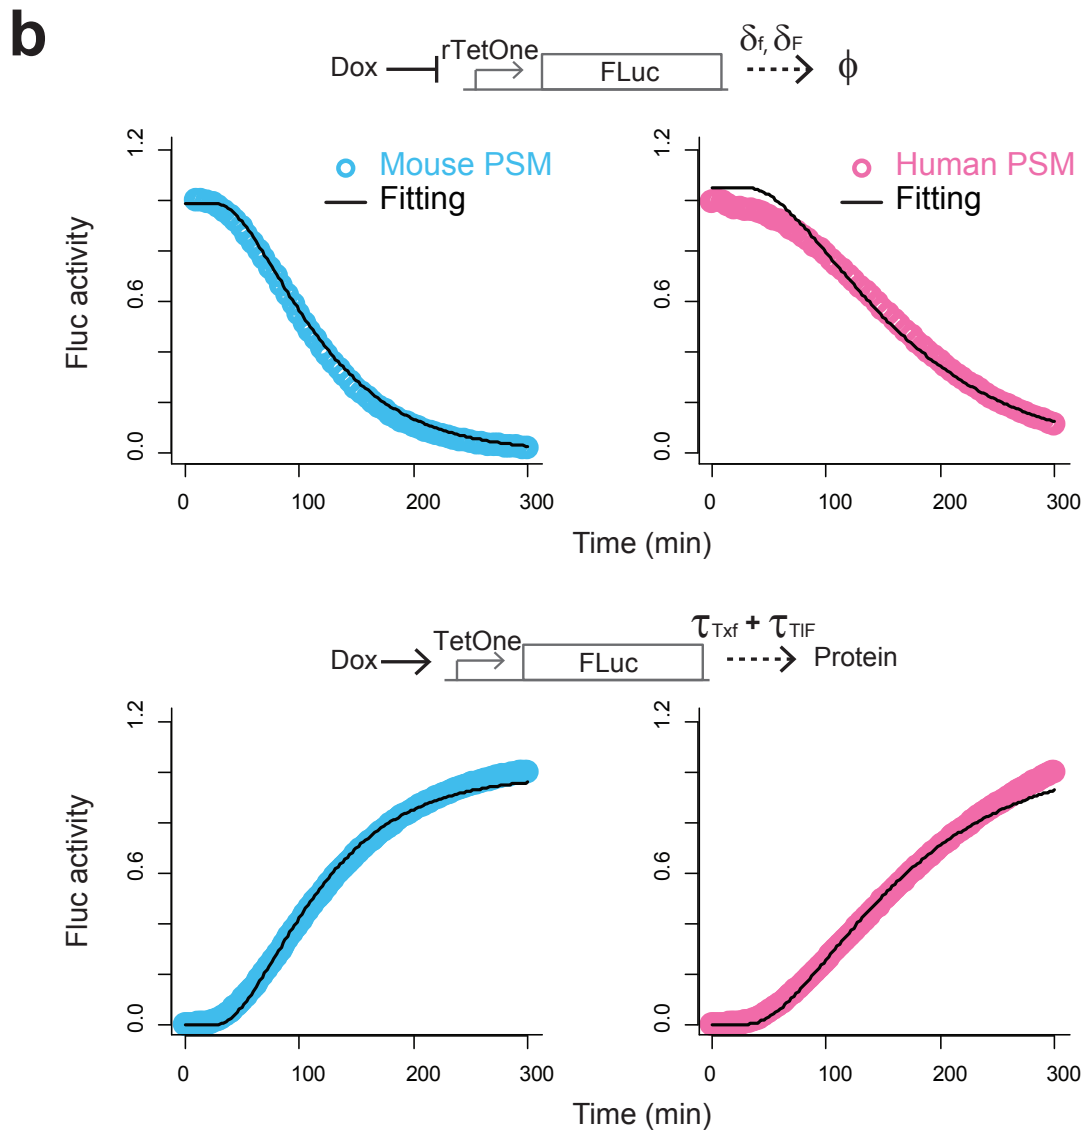

Mouse PSM

Human PSM

— Fitting

— Fitting

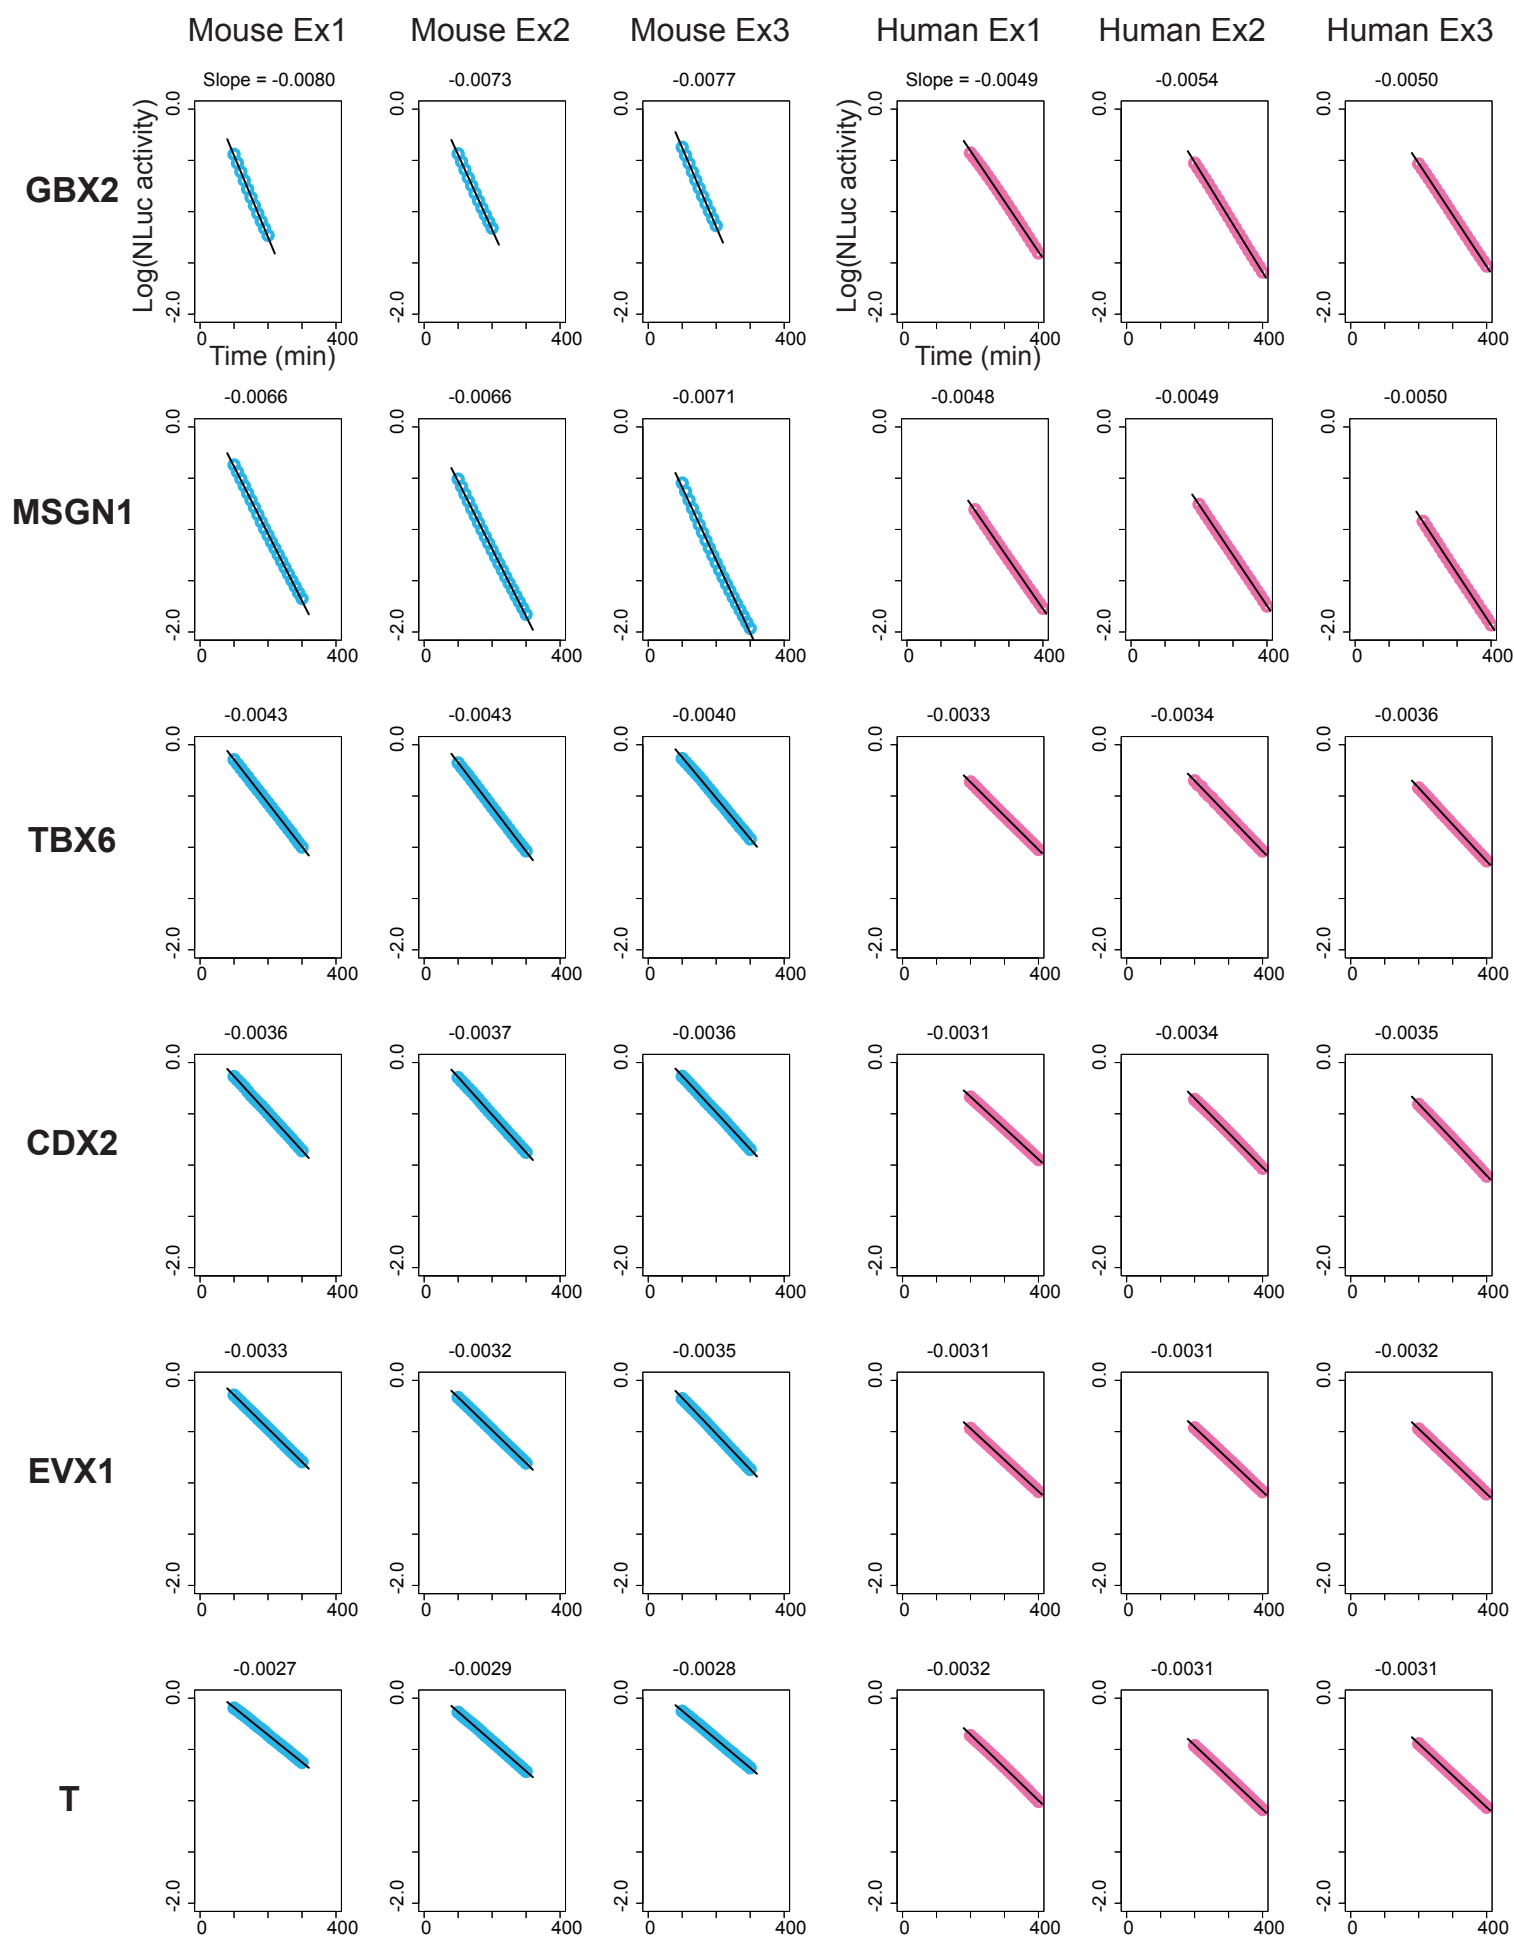

Supplementary Fig. 9

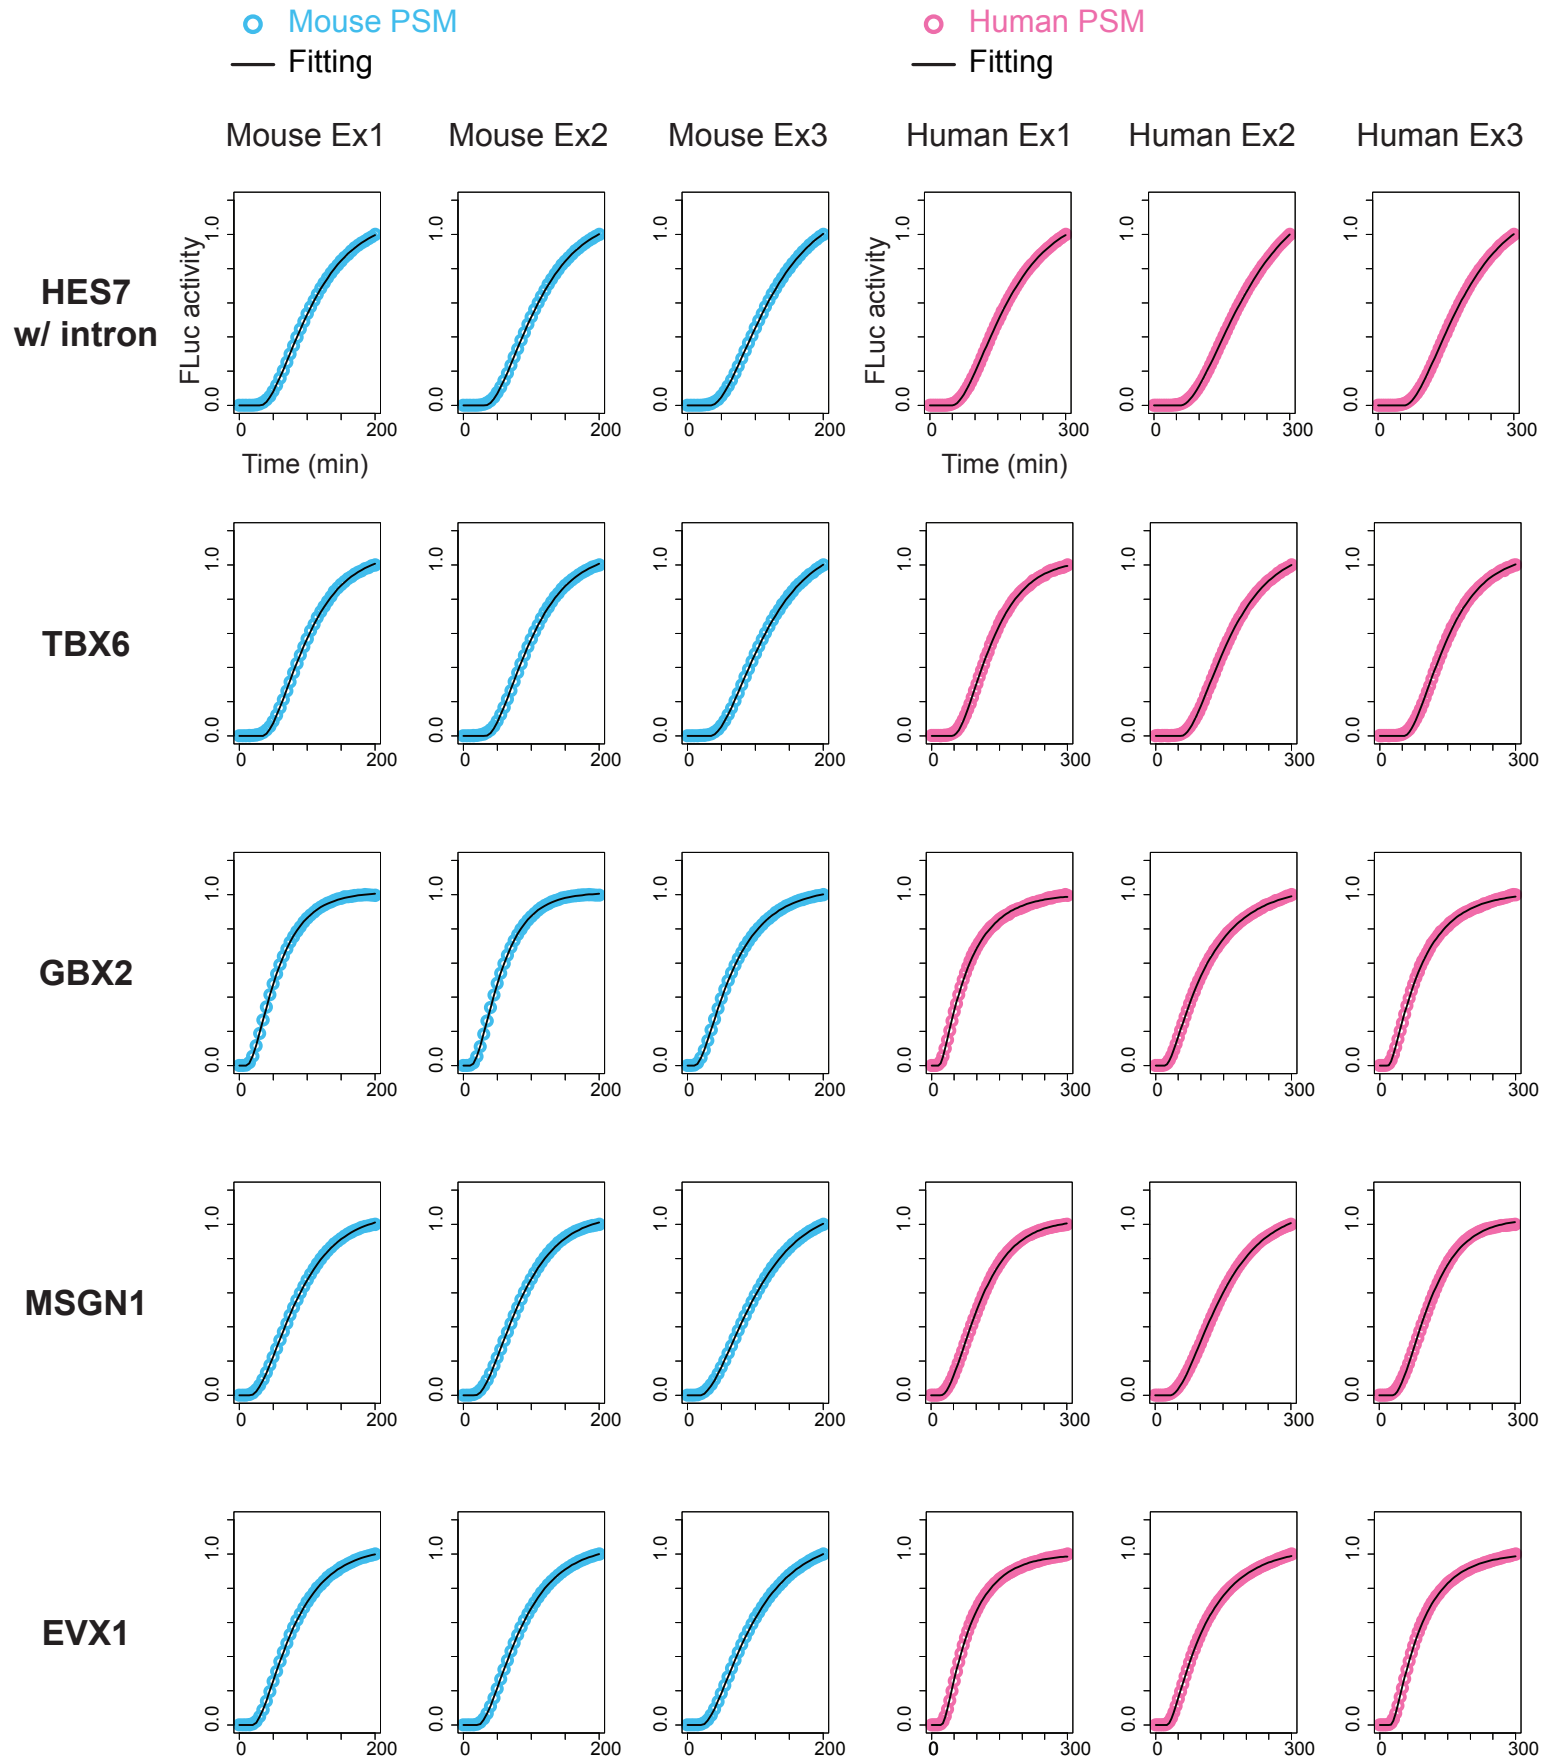

**Supplementary Fig. 10**

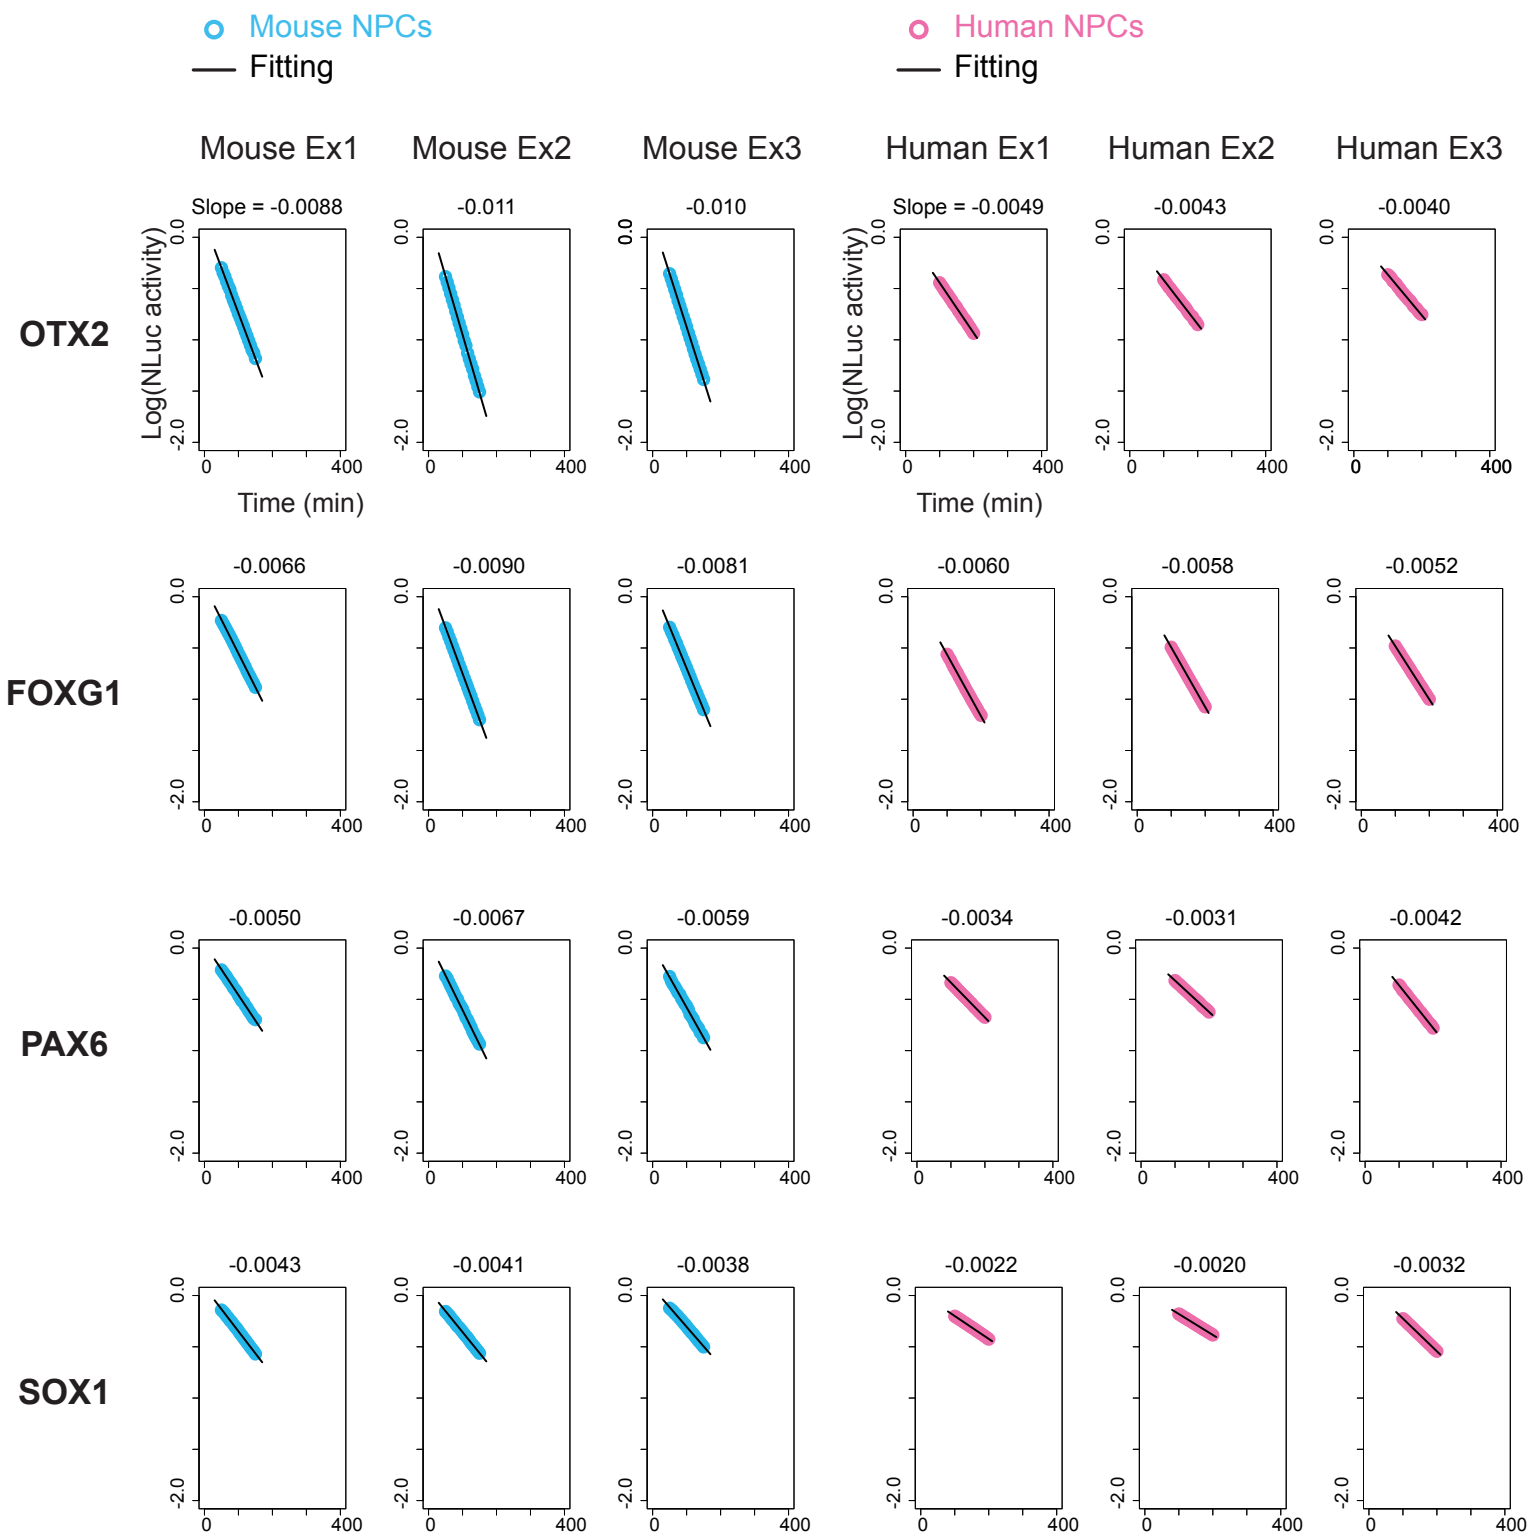



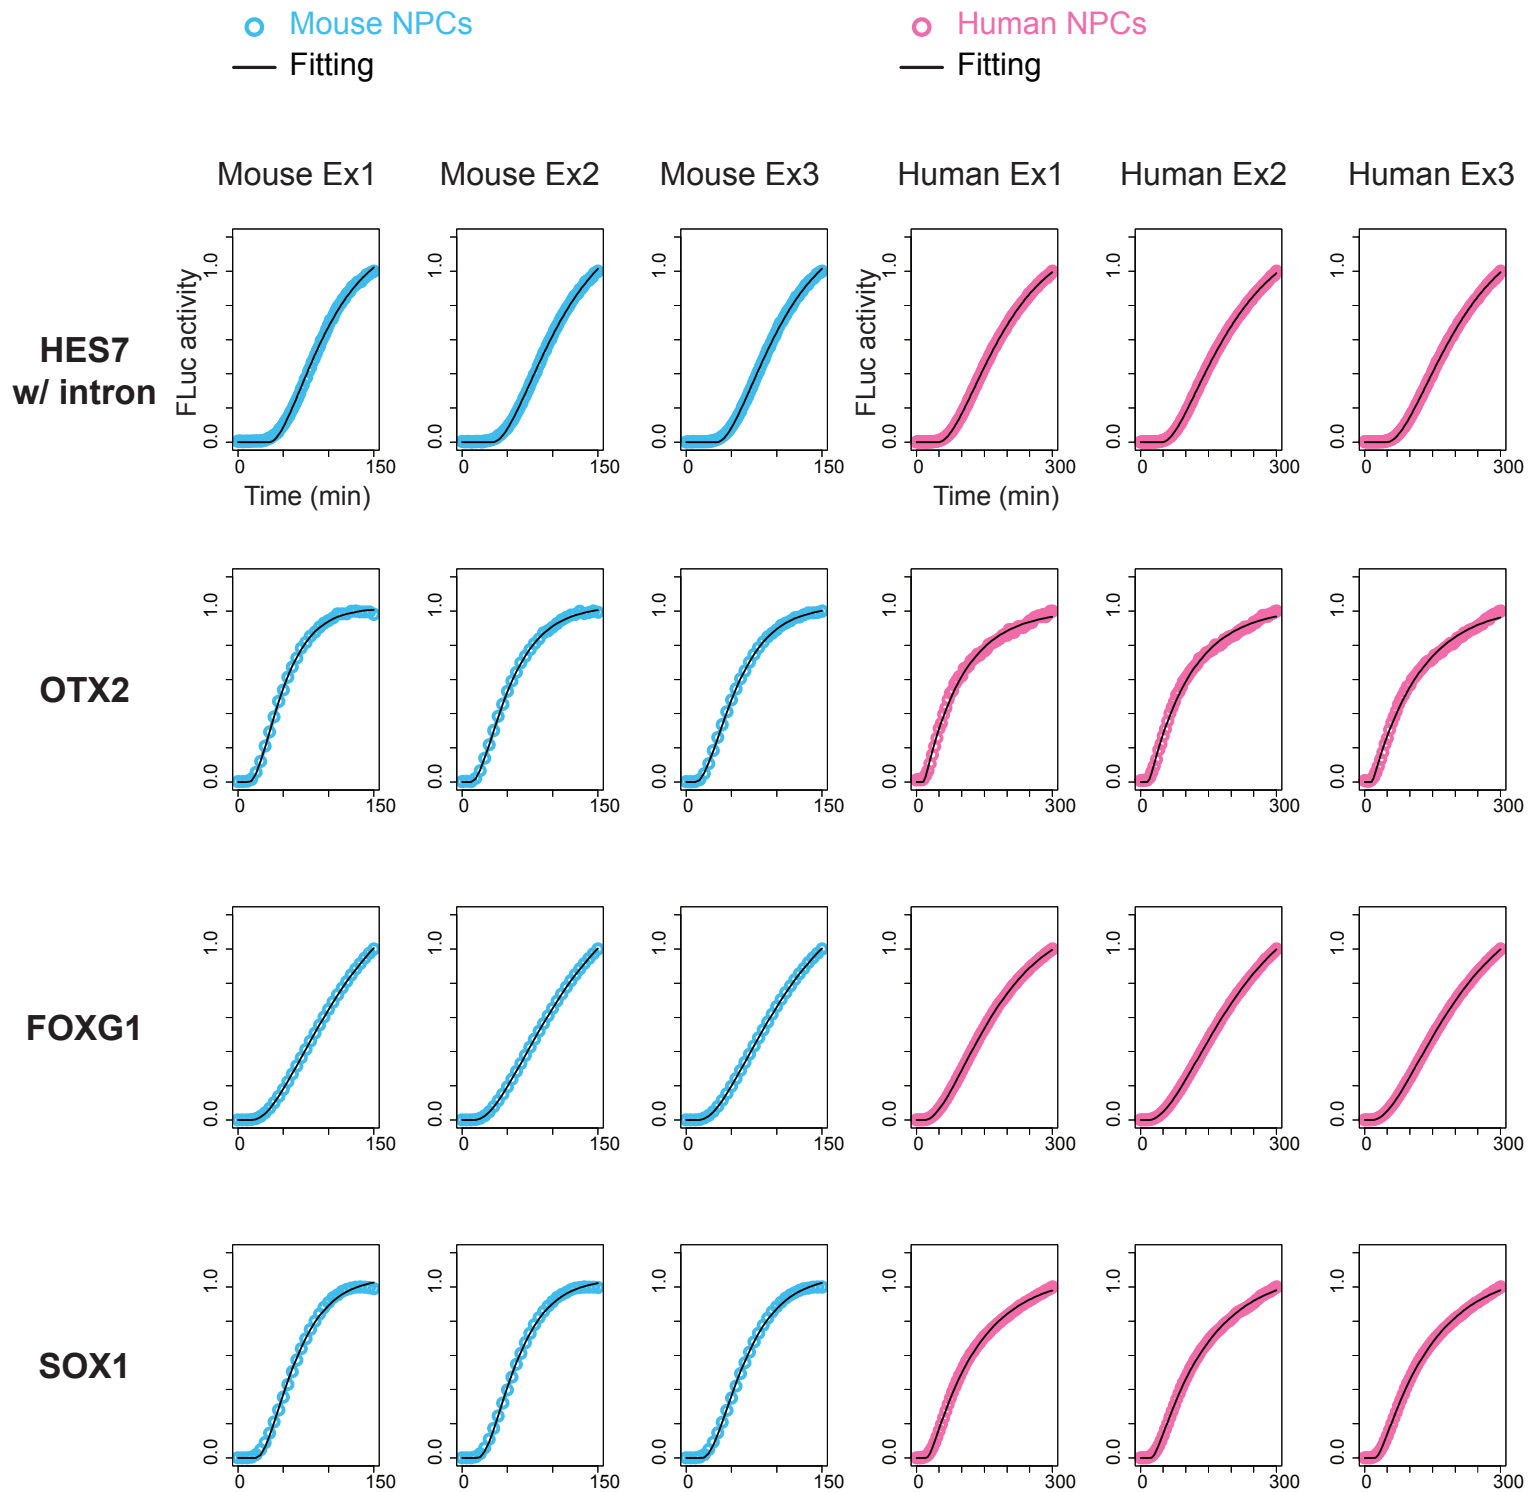

**Supplementary Fig. 12**

## Supplementary Text 1: Parameter dependency of simulated oscillation periods

The mathematical model of the HES7 system that we use to describe the behavior of the segmentation clock is [1]:

$$\frac{dm}{dt} = \frac{\beta}{1 + \left(\frac{p(t-\tau_m)}{K}\right)^n} - \delta_m m \quad (1)$$

$$\frac{dp}{dt} = \alpha m(t - \tau_p) - \delta_p p, \quad (2)$$

where  $m$  and  $p$  are the concentrations of HES7 mRNA and protein, respectively,  $\alpha$  and  $\beta$  are the translation and transcription rates,  $K$  is the repression threshold,  $n$  is the repression Hill coefficient,  $\delta_m$  and  $\delta_p$  are the degradation rates of the mRNA and protein, which we have measured experimentally as explained in the main text. The mRNA delay  $\tau_m$  is composed by the repression delay  $\tau_{Rp}$ , the transcription delay  $\tau_{Tx}$ , and the intron delay  $\tau_{In}$ , all of which we have measured experimentally as well. The protein delay  $\tau_p$ , in turn, corresponds to the translation delay  $\tau_{Tl}$ , which was also quantified using our experimental observations.

This system has a fixed point  $(m^*, p^*)$  for which the two derivatives above are zero, which obeys:

$$\frac{\beta}{1 + \left(\frac{p^*}{K}\right)^n} = \frac{\delta_m \delta_p p^*}{\alpha} \quad (3)$$

The stability of this fixed point can be analyzed by assuming the following temporal response to a small perturbation  $(a, b)$ :

$$m(t) = m^* + a \exp(\lambda t) \quad (4)$$

$$p(t) = p^* + b \exp(\lambda t) \quad (5)$$

Introducing expressions (4)-(5) into Eqs. (1)-(2), linearizing around  $a = b = 0$ , and imposing that a solution of the form (4)-(5) exists with nonzero  $a$  and  $b$ , leads to the following transcendental characteristic equation for the eigenvalues  $\lambda$ :

$$(\lambda + \delta_m)(\lambda + \delta_p) + \frac{n(\delta_m \delta_p)^2 p^{*n+1}}{\alpha \beta K^n} \exp(-\lambda(\tau_m + \tau_p)) = 0, \quad (6)$$

In general the eigenvalues are complex numbers  $\lambda = \sigma + i\omega$ . The eigenvalue with highest real part determines the stability of the fixed point, with  $\sigma < 0$  corresponding to an unstable fixed point, and  $\sigma > 0$  to a stable one. The corresponding imaginary part establishes the frequency at which the system oscillates towards the fixed point (if  $\sigma < 0$ ) or away from it (if  $\sigma > 0$ ). In the case of an unstable fixed point with  $\omega \neq 0$ , the system usually falls on a limit cycle whose period can be expected to be close to  $2\pi/\omega$ . Taking these considerations into account, Eq. (6) shows that **the period of the HES7 oscillations does not depend on the mRNA and protein delays separately, but only on the total delay  $\tau_m + \tau_p$ .**

For the parameters that we consider in this paper,  $p^* \gg K$ , as can be seen in Fig. 1, which represents graphically the solution of Eq. (3) as the crossing point between its left-hand side (blue line) and right-hand side (orange line). In the limit  $p^* \gg K$ , Eq. (3) has the following approximate solution:

$$p^{*n+1} = \frac{\alpha\beta K^n}{\delta_m\delta_p} \quad (7)$$

Inserting expression (7) into the characteristic equation (6) leads to:

$$(\lambda + \delta_m)(\lambda + \delta_p) + n\delta_m\delta_p \exp(-\lambda(\tau_m + \tau_p)) = 0, \quad (8)$$

Considering again that the imaginary part of the eigenvalue with the highest real part gives us an estimate of the oscillation period, we can observe from Eq. (8) that **the period of the HES7 oscillations does not depend on the values of the translation and transcription rates  $\alpha$  and  $\beta$ , nor on the repression threshold  $K$ .**

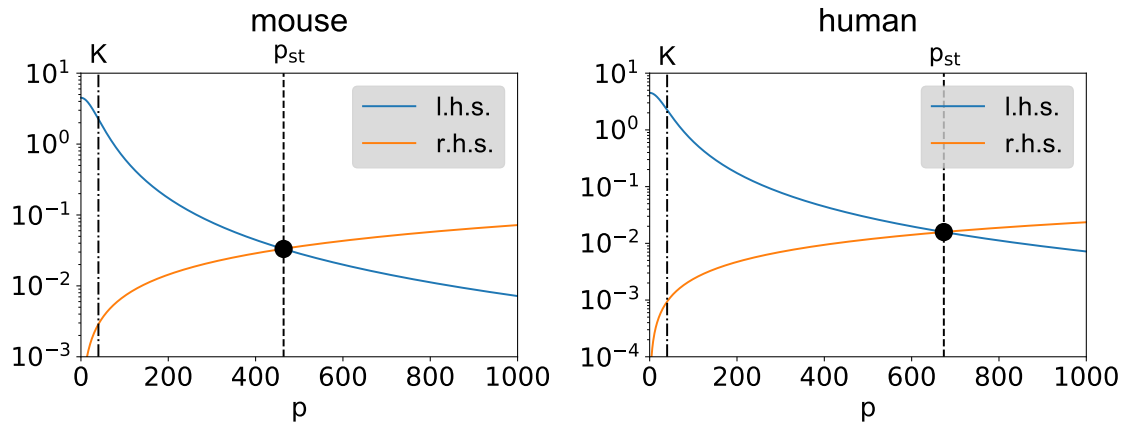

Figure 1: Graphical determination of the fixed point of the HES7 model used in this paper, for the parameters corresponding to the mouse (left) and human (right) cells.

Finally, if we focus on the bifurcation point ( $\sigma = 0$ ), we can obtain in closed form the period of the oscillations at that point by computing  $\omega$ . To that end, we write the real and imaginary parts of Eq. (8) for  $\lambda = i\omega$  and divide one by the other, to reach the following transcendental equation:

$$\tan(\omega\tau) = \frac{\omega(\delta_m + \delta_p)}{\omega^2 - \delta_m\delta_p} \quad (9)$$

We can thus see that **at the bifurcation point, the period of the oscillations does not depend on  $n$ , but only on the degradation rates of the mRNA and the protein, and on the total delay.** These observations are reproduced by our numerical simulations.

## References

- [1] J. Lewis, “Autoinhibition with transcriptional delay: a simple mechanism for the zebrafish somitogenesis oscillator,” *Current Biology*, vol. 13, no. 16, pp. 1398–1408, 2003.
